# Supplementary material
Source: PubMed Central journal article supplement (PMC3592005)
Supplement: JB.01032-12_zjb999092472so1.pdf [file JB.01032-12_zjb999092472so1.pdf]

**Table S1. List of strains used in this study.**

| Strain    | Source         | Disease association    | Genotype | <i>netB</i> | Country       | MLST type | Reference       |
|-----------|----------------|------------------------|----------|-------------|---------------|-----------|-----------------|
| MLST49    | Chicken        | Healthy                | A, cpb2+ | -           | Canada        | C19       | Chalmers, 2008a |
| PFGE A    | Chicken        | Healthy                | A        | -           | Canada        | n/a       | Chalmers, 2008b |
| PFGE C    | Chicken        | Healthy                | A        | -           | Canada        | n/a       | Chalmers, 2008b |
| PFGE F    | Chicken        | Healthy                | A        | -           | Canada        | n/a       | Chalmers, 2008b |
| PFGE B    | Chicken        | Healthy                | A, cpb2+ | -           | Canada        | n/a       | Chalmers, 2008b |
| PFGE E    | Chicken        | Healthy                | A, cpb2+ | -           | Canada        | n/a       | Chalmers, 2008b |
| PFGE H    | Chicken        | Healthy                | A, cpb2+ | -           | Canada        | n/a       | Chalmers, 2008b |
| JGS4042   | Chicken        | Necrotic enteritis     | A        | -           | United States | n/a       | n/a             |
| JGS4043   | Chicken        | Necrotic enteritis     | A        | -           | United States | n/a       | n/a             |
| JGS4066   | Chicken        | Necrotic enteritis     | A        | -           | United States | n/a       | n/a             |
| JP120     | Chicken        | Necrotic enteritis     | A        | -           | Canada        | n/a       | n/a             |
| JGS4120   | Chicken        | Necrotic enteritis     | A, cpb2+ | -           | United States | n/a       | n/a             |
| JGS4141   | Chicken        | Necrotic enteritis     | A, cpb2+ | -           | United States | n/a       | n/a             |
| JP121     | Chicken        | Necrotic enteritis     | A, cpb2+ | -           | Canada        | n/a       | n/a             |
| JP123     | Chicken        | Necrotic enteritis     | A, cpb2+ | -           | Canada        | n/a       | n/a             |
| JP148     | Chicken        | Necrotic enteritis     | A, cpb2+ | -           | Canada        | n/a       | n/a             |
| JP149     | Chicken        | Necrotic enteritis     | A, cpb2+ | -           | Canada        | n/a       | n/a             |
| CP5       | Chicken        | Healthy                | A        | -           | Canada        | n/a       | Thompson, 2006  |
| CP6       | Chicken        | Healthy                | A, cpb2+ | -           | Canada        | n/a       | Thompson, 2006  |
| JGS4143   | Chicken        | Necrotic enteritis     | A, cpb2+ | +           | United States | H31       | Barbara, 2008   |
| MLST11    | Chicken        | Necrotic enteritis     | A, cpb2+ | +           | Canada        | C4        | Chalmers, 2008a |
| MLST19    | Chicken        | Necrotic enteritis     | A, cpb2+ | +           | Canada        | C8        | Chalmers, 2008a |
| MLST23    | Chicken        | Necrotic enteritis     | A, cpb2+ | +           | Canada        | C10       | Chalmers, 2008a |
| MLST29    | Chicken        | Necrotic enteritis     | A, cpb2+ | +           | Canada        | C13       | Chalmers, 2008a |
| MLST31    | Chicken        | Necrotic enteritis     | A, cpb2+ | +           | Canada        | C10       | Chalmers, 2008a |
| PFGE G    | Chicken        | Healthy                | A, cpb2+ | +           | Canada        | n/a       | Chalmers, 2008b |
| JP125     | Chicken        | Necrotic enteritis     | A        | +           | Canada        | n/a       | n/a             |
| JGS4059   | Chicken        | Necrotic enteritis     | A, cpb2+ | +           | United States | n/a       | n/a             |
| JGS4135   | Chicken        | Necrotic enteritis     | A, cpb2+ | +           | United States | C3/4      | n/a             |
| JP150     | Chicken        | Necrotic enteritis     | A, cpb2+ | +           | Canada        | n/a       | n/a             |
| CP1       | Chicken        | Necrotic enteritis     | A, cpb2+ | +           | Canada        | n/a       | Thompson, 2006  |
| CP2       | Chicken        | Necrotic enteritis     | A, cpb2+ | +           | Canada        | n/a       | Thompson, 2006  |
| CP3       | Chicken        | Necrotic enteritis     | A, cpb2+ | +           | Canada        | n/a       | Thompson, 2006  |
| CP4       | Chicken        | Necrotic enteritis     | A, cpb2+ | +           | Canada        | H39/C1    | Thompson, 2006  |
| JP122     | Chicken        | Necrotic enteritis     | A, cpb2+ | +           | Canada        | n/a       | n/a             |
| JP116     | Retail chicken | Healthy                | A        | -           | Canada        | n/a       | Nowell, 2010    |
| JP67      | Retail chicken | Healthy                | A        | -           | Canada        | n/a       | Nowell, 2010    |
| JP73      | Retail chicken | Healthy                | A        | -           | Canada        | n/a       | Nowell, 2010    |
| JP79      | Retail chicken | Healthy                | A        | -           | Canada        | n/a       | Nowell, 2010    |
| JP83      | Retail chicken | Healthy                | A        | -           | Canada        | n/a       | Nowell, 2010    |
| JP88      | Retail chicken | Healthy                | A        | -           | Canada        | n/a       | Nowell, 2010    |
| JP97      | Retail chicken | Healthy                | A        | -           | Canada        | n/a       | Nowell, 2010    |
| JP69      | Retail chicken | Healthy                | A, cpb2+ | -           | Canada        | n/a       | Nowell, 2010    |
| JP75      | Retail chicken | Healthy                | A, cpb2+ | -           | Canada        | n/a       | Nowell, 2010    |
| JP78      | Retail chicken | Healthy                | A, cpb2+ | -           | Canada        | n/a       | Nowell, 2010    |
| JP80      | Retail chicken | Healthy                | A, cpb2+ | -           | Canada        | n/a       | Nowell, 2010    |
| JP84      | Retail chicken | Healthy                | A, cpb2+ | -           | Canada        | n/a       | Nowell, 2010    |
| JP90      | Retail chicken | Healthy                | A, cpb2+ | -           | Canada        | n/a       | Nowell, 2010    |
| JP93      | Retail chicken | Healthy                | A, cpb2+ | -           | Canada        | n/a       | Nowell, 2010    |
| JP77      | Retail chicken | Healthy                | A, cpb2+ | +           | Canada        | n/a       | Nowell, 2010    |
| JP82      | Retail chicken | Healthy                | A, cpb2+ | +           | Canada        | n/a       | Nowell, 2010    |
| JP86      | Retail chicken | Healthy                | A, cpb2+ | +           | Canada        | n/a       | Nowell, 2010    |
| JP91      | Retail chicken | Healthy                | A, cpb2+ | +           | Canada        | n/a       | Nowell, 2010    |
| JP94      | Retail chicken | Healthy                | A, cpb2+ | +           | Canada        | n/a       | Nowell, 2010    |
| Str13     | Soil           | n/a                    | A        | -           | Canada        | n/a       | Mahoney, 1976   |
| ATCC13124 | Human          | Gas gangrene           | A        | -           | n/a           | n/a       | n/a             |
| NCTC8239  | Human          | Food poisoning         | A        | -           | n/a           | n/a       | n/a             |
| SM101     | Human          | Food poisoning         | A        | -           | n/a           | n/a       | n/a             |
| F4969     | Human          | Non-food-borne disease | A        | -           | n/a           | n/a       | n/a             |
| ATCC3626  | Lamb           | N/A                    | B        | -           | n/a           | n/a       | n/a             |
| JGS1495   | Pig            | Diarrhea               | C        | -           | n/a           | n/a       | n/a             |
| JGS1721   | Sheep          | Enteritis              | D        | -           | n/a           | n/a       | n/a             |
| JGS1987   | Cow            | Enteritis              | E        | -           | n/a           | n/a       | n/a             |

n/a; not available

**Table S2. Primers used for detection of *netB* and *cpb2* and for PCR confirmation of CGH results.**

| Locus tag <sup>1</sup>   | Forward primer (5'-3')  | Reverse primer (5'-3')   | Product size (bp) |
|--------------------------|-------------------------|--------------------------|-------------------|
| CP4_3449 ( <i>netB</i> ) | GCTGGTGCTGGAATAAATGC    | TCGCCATTGAGTAGTTTCCC     | 383               |
| CP4_3441 ( <i>cpb2</i> ) | AGATTTTAAATATGATCCTAACC | CAATACCCTTCACCAAATACTC   | 567               |
| CP4_0445                 | TGGGATTCTTTGGTTCTTGG    | CATTCCAAGCTTCCTCTGG      | 155               |
| CP4_0448                 | GCATGGGGAAGAGAAAGACA    | ATCAGGATGAATTCCCATCA     | 223               |
| CP4_0463                 | ATGCCAAACTTGGAGGAGAG    | GCAGCTTCTGCAATTGGACT     | 210               |
| CP4_0468                 | TTGGACAACAAGGGTTTGGT    | GCGCTTGAGACCAACAAATA     | 223               |
| CP4_0783                 | GAGGAGCATTATGGACAGCTT   | CCCATCATTCTTGATTTGG      | 136               |
| CP4_1608                 | TGTGGGGCGAAAAATAAAAA    | CATCTTTTTCTCCGCCTTGA     | 170               |
| CP4_2645                 | CAAGTTCGCACTAGACGGATT   | GACAACCTGGACATTCTCAAAGG  | 214               |
| CP4_2821                 | TTACCTGGAGTGGCTCCAAC    | ACACCTGGTCCTTGAGCATC     | 175               |
| JGS4143-0169             | GTGCAGATGCTGCTTTTGAT    | TTAAACCACCAGCCTGATCC     | 194               |
| JGS4143-0500             | CCATCAGAGCATATTGCAAGG   | TTGAAAAAGTTGGTTGGATAAAAA | 175               |

<sup>1</sup> Representative CDS from either the CP4 or JGS4143 genome sequence

Table S3. Variable genes identified among 63 poultry and non-poultry isolates.

| Variable Region | Locus_tag    | Product                                                                                                                       | Start                                                                                                                         | Stop   | Size (bp) | Functional Category/Subcategory                                                             | Prevalence                                                          | phage/IS | Plasmid Hit | pNet8 Hit |  |
|-----------------|--------------|-------------------------------------------------------------------------------------------------------------------------------|-------------------------------------------------------------------------------------------------------------------------------|--------|-----------|---------------------------------------------------------------------------------------------|---------------------------------------------------------------------|----------|-------------|-----------|--|
| VR-01           | CP4_0296     | galactoside O-acetyltransferase                                                                                               | 323322                                                                                                                        | 323936 | 614       | Carbohydrates/Lactose utilization                                                           | 0.67                                                                |          |             |           |  |
| VR-02           | CP4_0377     | conserved hypothetical protein                                                                                                | 411726                                                                                                                        | 412112 | 386       | None/None                                                                                   | 0.82                                                                |          |             |           |  |
|                 | CP4_0378     | conserved hypothetical protein                                                                                                | 412128                                                                                                                        | 412532 | 404       | None/None                                                                                   | 0.74                                                                |          |             |           |  |
|                 | CP4_0379     | conserved hypothetical protein                                                                                                | 412603                                                                                                                        | 412806 | 203       | None/None                                                                                   | 0.76                                                                |          |             |           |  |
| VR-03           | CP4_0391     | conserved hypothetical protein                                                                                                | 428535                                                                                                                        | 429779 | 1244      | None/None                                                                                   | 0.82                                                                |          |             |           |  |
|                 | CP4_0392     | RNA polymerase ECF-type sigma factor                                                                                          | 429793                                                                                                                        | 430329 | 536       | None/None                                                                                   | 0.79                                                                |          |             |           |  |
|                 | CP4_0430     | caudovirus prohead protease                                                                                                   | 461245                                                                                                                        | 461898 | 653       | None/None                                                                                   | 0.45                                                                | Yes      |             |           |  |
| VR-04           | CP4_0439     | phage tail tape measure protein, family                                                                                       | 465787                                                                                                                        | 469560 | 3773      | Phages, Prophages, Transposable elements, Plasmids/Phage tail proteins                      | 0.65                                                                | Yes      |             |           |  |
|                 | CP4_0444     | transcriptional regulator                                                                                                     | 476909                                                                                                                        | 477766 | 857       | Carbohydrates/Fructooligosaccharides(FOS) and Raffinose Utilization                         | 0.82                                                                |          |             |           |  |
|                 | CP4_0445     | extracellular solute-binding protein                                                                                          | 477955                                                                                                                        | 479223 | 1268      | Miscellaneous/COG3533 Carbohydrates/Chitin and N-acetylglucosamine utilization              | 0.76                                                                |          |             |           |  |
|                 | CP4_0446     | ABC transporter                                                                                                               | 479297                                                                                                                        | 480223 | 926       | Carbohydrates/Chitin and N-acetylglucosamine utilization                                    | 0.82                                                                |          |             |           |  |
|                 | CP4_0447     | sugar ABC transporter                                                                                                         | 480240                                                                                                                        | 481067 | 827       | Carbohydrates/Fructooligosaccharides(FOS) and Raffinose Utilization                         | 0.76                                                                |          |             |           |  |
|                 | CP4_0448     | alpha-galactosidase 1                                                                                                         | 481095                                                                                                                        | 483302 | 2207      | Miscellaneous/COG3533 Carbohydrates/Fructooligosaccharides(FOS) and Raffinose Utilization   | 0.76                                                                |          |             |           |  |
|                 |              |                                                                                                                               |                                                                                                                               |        |           | Carbohydrates/Lactose and Galactose Uptake and Utilization                                  |                                                                     |          |             |           |  |
|                 |              |                                                                                                                               |                                                                                                                               |        |           | Sulfur Metabolism/Galactosylceramide and Sulfatide metabolism                               |                                                                     |          |             |           |  |
|                 |              |                                                                                                                               |                                                                                                                               |        |           |                                                                                             |                                                                     |          |             |           |  |
|                 |              |                                                                                                                               |                                                                                                                               |        |           |                                                                                             |                                                                     |          |             |           |  |
| VR-06           | CP4_0458     | sigma factor SglI                                                                                                             | 496054                                                                                                                        | 496704 | 650       | RNA Metabolism/Transcription initiation, bacterial sigma factors                            | 0.61                                                                |          |             |           |  |
|                 | CP4_0459     | conserved hypothetical protein                                                                                                | 496717                                                                                                                        | 497763 | 1046      | None/None                                                                                   | 0.67                                                                |          |             |           |  |
|                 | CP4_0460     | putative VTC domain superfamily                                                                                               | 497902                                                                                                                        | 498600 | 698       | None/None                                                                                   | 0.61                                                                |          |             |           |  |
|                 | CP4_0461     | putative tubulin/FtsZ, GTPase                                                                                                 | 498633                                                                                                                        | 499313 | 680       | None/None                                                                                   | 0.70                                                                |          |             |           |  |
|                 | CP4_0462     | resolvase                                                                                                                     | 499492                                                                                                                        | 500043 | 551       | None/None                                                                                   | 0.56                                                                | Yes      |             |           |  |
|                 | CP4_0464     | putative VTC domain superfamily                                                                                               | 500285                                                                                                                        | 500977 | 692       | None/None                                                                                   | 0.58                                                                |          |             |           |  |
|                 | CP4_0464     | tubulin/FtsZ, GTPase                                                                                                          | 501023                                                                                                                        | 501571 | 548       | None/None                                                                                   | 0.56                                                                |          |             |           |  |
|                 | CP4_0465     | Coth protein                                                                                                                  | 501673                                                                                                                        | 503166 | 1493      | None/None                                                                                   | 0.61                                                                |          |             |           |  |
|                 | CP4_0466     | conserved hypothetical protein                                                                                                | 503180                                                                                                                        | 505237 | 2057      | None/None                                                                                   | 0.56                                                                |          |             |           |  |
|                 | CP4_0467     | putative heat repeat                                                                                                          | 505247                                                                                                                        | 506380 | 1133      | None/None                                                                                   | 0.56                                                                |          |             |           |  |
|                 | CP4_0468     | chitin synthase                                                                                                               | 506374                                                                                                                        | 507774 | 1400      | Cell Wall and Capsule/Exopolysaccharide Biosynthesis                                        | 0.56                                                                |          |             |           |  |
|                 | VR-07        | CP4_0526                                                                                                                      | iron uptake protein A1                                                                                                        | 569626 | 570678    | 1052                                                                                        | None/None                                                           | 0.82     |             |           |  |
| CP4_0528        |              | Fe(3+) ions import ATP-binding protein FbpC                                                                                   | 572273                                                                                                                        | 572953 | 680       | None/None                                                                                   | 0.82                                                                |          |             |           |  |
| CP4_0529        |              | nitrite reductase                                                                                                             | 573243                                                                                                                        | 573932 | 689       | None/None                                                                                   | 0.82                                                                |          |             |           |  |
| VR-08           | CP4_0540     | transposase                                                                                                                   | 581374                                                                                                                        | 582468 | 1094      | None/None                                                                                   | 0.38                                                                | Yes      |             |           |  |
|                 | CP4_0543     | conserved hypothetical protein                                                                                                | 584187                                                                                                                        | 584819 | 632       | None/None                                                                                   | 0.89                                                                |          |             |           |  |
| VR-09           | CP4_0547     | conserved hypothetical protein                                                                                                | 590383                                                                                                                        | 590796 | 413       | None/None                                                                                   | 0.89                                                                |          |             |           |  |
|                 | CP4_0552     | UDP-N-acetyl-D-mannosamine dehydrogenase                                                                                      | 594668                                                                                                                        | 595897 | 1229      | Cell Wall and Capsule/Streptococcal Hyaluronic Acid Capsule                                 | 0.36                                                                |          |             |           |  |
| VR-10B          | CP4_0573     | signal peptidase I                                                                                                            | 622794                                                                                                                        | 623174 | 380       | Protein Metabolism/Signal peptidase                                                         | 0.60                                                                |          |             |           |  |
|                 | CP4_0575     | sortase, SrtB family                                                                                                          | 624275                                                                                                                        | 625024 | 749       | Cell Wall and Capsule/Sortase                                                               | 0.47                                                                |          |             |           |  |
|                 |              |                                                                                                                               |                                                                                                                               |        |           | Iron acquisition and metabolism/Heme, hemin uptake and utilization systems in GramPositives |                                                                     |          |             |           |  |
|                 | CP4_0577     | DNA-binding response regulator                                                                                                | 626518                                                                                                                        | 627234 | 716       | None/None                                                                                   | 0.67                                                                |          |             |           |  |
|                 | CP4_0578     | sensor histidine kinase                                                                                                       | 627239                                                                                                                        | 628537 | 1298      | None/None                                                                                   | 0.52                                                                |          |             |           |  |
| VR-10A          | JGS4143-0549 | signal peptidase I                                                                                                            | 592665                                                                                                                        | 593213 | 548       | Protein Metabolism/Signal peptidase                                                         | 0.55                                                                |          |             |           |  |
|                 | JGS4143-0551 | conserved hypothetical protein                                                                                                | 593950                                                                                                                        | 594681 | 731       | None/None                                                                                   | 0.82                                                                |          |             |           |  |
|                 | JGS4143-0552 | conserved hypothetical protein                                                                                                | 594584                                                                                                                        | 595310 | 726       | None/None                                                                                   | 0.45                                                                |          |             |           |  |
|                 | JGS4143-0553 | von Willebrand factor type A domain protein                                                                                   | 595327                                                                                                                        | 597171 | 1844      | None/None                                                                                   | 0.81                                                                |          |             |           |  |
|                 | JGS4143-0554 | two-component response regulator                                                                                              | 597449                                                                                                                        | 597883 | 434       | None/None                                                                                   | 0.45                                                                |          |             |           |  |
|                 | JGS4143-0555 | two-component response regulator                                                                                              | 597964                                                                                                                        | 598164 | 200       | None/None                                                                                   | 0.55                                                                |          |             |           |  |
|                 | JGS4143-0556 | hypothetical protein                                                                                                          | 598378                                                                                                                        | 598542 | 164       | None/None                                                                                   | 0.86                                                                |          |             |           |  |
|                 | CP4_0615     | conserved hypothetical protein                                                                                                | 666705                                                                                                                        | 667352 | 647       | None/None                                                                                   | 0.85                                                                |          |             |           |  |
| VR-12           | CP4_0621     | conserved hypothetical protein                                                                                                | 675901                                                                                                                        | 676992 | 1091      | None/None                                                                                   | 0.88                                                                |          |             |           |  |
| VR-13           | CP4_0677     | undecaprenyl phosphate galactose phosphotransferase                                                                           | 745810                                                                                                                        | 746472 | 662       | Cell Wall and Capsule/Exopolysaccharide Biosynthesis                                        | 0.83                                                                |          |             |           |  |
|                 | CP4_0678     | glycosyl transferase, group 2 family protein                                                                                  | 746473                                                                                                                        | 747387 | 914       | None/None                                                                                   | 0.77                                                                |          |             |           |  |
|                 | CP4_0679     | glucose-1-phosphate thymidyltransferase                                                                                       | 747410                                                                                                                        | 748291 | 881       | Cell Wall and Capsule/dTDP-rhamnose synthesis                                               | 0.89                                                                |          |             |           |  |
|                 | CP4_0681     | dTDP-4-dehydroammonse reductase                                                                                               | 748980                                                                                                                        | 749864 | 884       | Cell Wall and Capsule/dTDP-rhamnose synthesis                                               | 0.89                                                                |          |             |           |  |
|                 | CP4_0682     | dTDP-glucose 4,6-dehydratase                                                                                                  | 749892                                                                                                                        | 750941 | 1049      | Cell Wall and Capsule/dTDP-rhamnose synthesis                                               | 0.89                                                                |          |             |           |  |
|                 | CP4_0683     | membrane protein, putative                                                                                                    | 750966                                                                                                                        | 752180 | 1214      | None/None                                                                                   | 0.61                                                                |          |             |           |  |
|                 | CP4_0684     | glycosyl transferase, group 2 family protein                                                                                  | 752177                                                                                                                        | 753025 | 848       | None/None                                                                                   | 0.65                                                                |          |             |           |  |
|                 | CP4_0685     | conserved hypothetical protein                                                                                                | 753119                                                                                                                        | 753859 | 740       | None/None                                                                                   | 0.79                                                                |          |             |           |  |
|                 | CP4_0686     | polysaccharide biosynthesis protein                                                                                           | 753868                                                                                                                        | 755319 | 1451      | None/None                                                                                   | 0.88                                                                |          |             |           |  |
|                 | CP4_0687     | cell wall binding repeat-containing protein/mannosyl-glycoprotein endo-beta-N-acetylglucosaminidase domain-containing protein | 755341                                                                                                                        | 757548 | 2207      | Stress Response/Choline and Betaine Uptake and Betaine Biosynthesis                         | 0.86                                                                |          |             |           |  |
|                 | VR-14        | CP4_0688                                                                                                                      | cell wall binding repeat-containing protein/mannosyl-glycoprotein endo-beta-N-acetylglucosaminidase domain-containing protein | 757630 | 757761    | 131                                                                                         | Stress Response/Choline and Betaine Uptake and Betaine Biosynthesis | 0.70     |             |           |  |
|                 |              | CP4_0689                                                                                                                      | cell wall binding repeat-containing protein/zinc carboxypeptidase family protein                                              | 757890 | 759542    | 1652                                                                                        | Stress Response/Choline and Betaine Uptake and Betaine Biosynthesis | 0.74     |             |           |  |
|                 |              | CP4_0690                                                                                                                      | cell wall binding repeat-containing protein                                                                                   | 759744 | 760046    | 302                                                                                         | Stress Response/Choline and Betaine Uptake and Betaine Biosynthesis | 0.64     |             |           |  |
| VR-15           | CP4_0691     | cell wall binding repeat-containing protein                                                                                   | 760109                                                                                                                        | 761134 | 1025      | Stress Response/Choline and Betaine Uptake and Betaine Biosynthesis                         | 0.88                                                                |          |             |           |  |
| VR-16           | CP4_0783     | oxidoreductase, FAD/FMN-binding                                                                                               | 864456                                                                                                                        | 865562 | 1106      | None/None                                                                                   | 0.63                                                                |          |             |           |  |
| VR-17           | CP4_0797     | RNA polymerase ECF-type sigma factor                                                                                          | 878906                                                                                                                        | 879424 | 518       | None/None                                                                                   | 0.89                                                                |          |             |           |  |
| VR-18           | CP4_0831     | conserved hypothetical protein                                                                                                | 917627                                                                                                                        | 918571 | 944       | None/None                                                                                   | 0.73                                                                |          |             |           |  |
|                 | CP4_0833     | hypothetical protein                                                                                                          | 920211                                                                                                                        | 920720 | 509       | None/None                                                                                   | 0.89                                                                |          |             |           |  |
| VR-19           | CP4_0841     | conserved hypothetical protein                                                                                                | 929745                                                                                                                        | 930323 | 578       | None/None                                                                                   | 0.47                                                                |          |             |           |  |
| VR-20           | CP4_0850     | conserved hypothetical protein                                                                                                | 939101                                                                                                                        | 939595 | 494       | None/None                                                                                   | 0.88                                                                |          |             |           |  |
| VR-21           | CP4_0859     | rubredoxin                                                                                                                    | 952749                                                                                                                        | 952910 | 161       | Stress Response/Rubredoxin                                                                  | 0.89                                                                |          |             |           |  |
| VR-22           | CP4_0874     | probable iron(III) dicitrate ABC transporter                                                                                  | 967641                                                                                                                        | 968591 | 950       | None/None                                                                                   | 0.80                                                                |          |             |           |  |
|                 | CP4_0875     | iron compound ABC transporter, permease protein                                                                               | 968721                                                                                                                        | 969725 | 1004      | None/None                                                                                   | 0.79                                                                |          |             |           |  |
|                 | CP4_0876     | ABC transport system permease protein                                                                                         | 969725                                                                                                                        | 970747 | 1022      | None/None                                                                                   | 0.85                                                                |          |             |           |  |
|                 | CP4_0877     | ferrichrome transport ATP-binding protein FhuC                                                                                | 970753                                                                                                                        | 971523 | 770       | None/None                                                                                   | 0.82                                                                |          |             |           |  |
|                 | CP4_0896     | conserved hypothetical protein                                                                                                | 991376                                                                                                                        | 991693 | 317       | None/None                                                                                   | 0.86                                                                |          |             |           |  |

Table S3. Variable genes identified among 63 poultry and non-poultry isolates.

| Variable Region | Locus_tag                            | Product                                                             | Start   | Stop    | Size (bp)                                                                    | Functional Category/Subcategory                                                                               | Prevalence | phage/IS | Plasmid Hit                                                                                                          | pNet8 Hit |
|-----------------|--------------------------------------|---------------------------------------------------------------------|---------|---------|------------------------------------------------------------------------------|---------------------------------------------------------------------------------------------------------------|------------|----------|----------------------------------------------------------------------------------------------------------------------|-----------|
| VR-24           | CP4_0919                             | sensory transduction protein BceR                                   | 1019475 | 1020143 | 668                                                                          | None/None                                                                                                     | 0.89       |          |                                                                                                                      |           |
|                 | CP4_0924                             | bactiracin export ATP-binding protein BceA                          | 1024417 | 1025184 | 767                                                                          | None/None                                                                                                     | 0.89       |          |                                                                                                                      |           |
|                 | CP4_0927                             | stress responsive alpha-beta barrel domain-containing protein       | 1029259 | 1029561 | 302                                                                          | None/None                                                                                                     | 0.82       |          |                                                                                                                      |           |
| CP4_0929        | conserved hypothetical protein       | 1031131                                                             | 1032048 | 917     | None/None                                                                    | 0.86                                                                                                          |            |          |                                                                                                                      |           |
|                 | CP4_0947                             | conserved hypothetical protein                                      | 1057864 | 1057986 | 122                                                                          | None/None                                                                                                     | 0.86       |          |                                                                                                                      |           |
| VR-25           | CP4_0950                             | conserved hypothetical protein                                      | 1060835 | 1061071 | 236                                                                          | None/None                                                                                                     | 0.87       |          |                                                                                                                      |           |
|                 | CP4_0963                             | resolvase domain-containing protein                                 | 1066623 | 1066748 | 125                                                                          | None/None                                                                                                     | 0.86       | Yes      |                                                                                                                      |           |
| VR-27           | CP4_1008                             | conserved hypothetical protein                                      | 1107491 | 1108213 | 722                                                                          | None/None                                                                                                     | 0.82       |          |                                                                                                                      |           |
|                 | CP4_1010                             | putative toxin-antitoxin system, toxin component                    | 1109470 | 1109934 | 464                                                                          | None/None                                                                                                     | 0.60       | Yes      |                                                                                                                      |           |
| VR-28           | CP4_1036                             | putative phage terminase, large subunit                             | 1121539 | 1122906 | 1367                                                                         | Phages, Prophages, Transposable elements, Plasmids/Phage packaging machinery                                  | 0.65       | Yes      |                                                                                                                      |           |
| VR-29           | CP4_1061                             | DNA adenine-specific methyltransferase                              | 1141541 | 1142320 | 779                                                                          | None/None                                                                                                     | 0.33       | Yes      |                                                                                                                      |           |
| VR-30           | CP4_1069                             | probable autolytic lysozyme                                         | 1148003 | 1149031 | 1028                                                                         | None/None                                                                                                     | 0.76       | Yes      |                                                                                                                      |           |
|                 | CP4_1071                             | conserved hypothetical protein                                      | 1150159 | 1150590 | 431                                                                          | None/None                                                                                                     | 0.73       |          |                                                                                                                      |           |
|                 | CP4_1076                             | phosphorylase family protein                                        | 1155215 | 1155400 | 185                                                                          | None/None                                                                                                     | 0.86       |          |                                                                                                                      |           |
| VR-31           | CP4_1098                             | caax amino protease family protein                                  | 1175507 | 1176310 | 803                                                                          | None/None                                                                                                     | 0.89       |          |                                                                                                                      |           |
|                 | CP4_1099                             | ProFAR isomerase associated superfamily                             | 1176593 | 1179449 | 356                                                                          | None/None                                                                                                     | 0.87       |          |                                                                                                                      |           |
|                 | CP4_1100                             | conserved hypothetical protein                                      | 1177033 | 1177227 | 194                                                                          | Protein Metabolism/Aminopeptidases [EC 3.4.11.-]                                                              | 0.88       |          |                                                                                                                      |           |
| VR-32           | CP4_1106                             | conserved hypothetical protein                                      | 1182472 | 1182585 | 113                                                                          | None/None                                                                                                     | 0.82       |          |                                                                                                                      |           |
|                 | CP4_1107                             | methionyl-tRNA formyltransferase                                    | 1182759 | 1183712 | 953                                                                          | Protein Metabolism/Translation initiation factors bacterial                                                   | 0.88       |          |                                                                                                                      |           |
|                 | CP4_1110                             | transcriptional regulator                                           | 1185544 | 1185858 | 314                                                                          | None/None                                                                                                     | 0.90       |          |                                                                                                                      |           |
| VR-33           | CP4_1114                             | conserved hypothetical protein                                      | 1187176 | 1187508 | 332                                                                          | None/None                                                                                                     | 0.88       |          |                                                                                                                      |           |
|                 | CP4_1130                             | putative toxin-antitoxin system, toxin component                    | 1205424 | 1205867 | 443                                                                          | None/None                                                                                                     | 0.82       |          |                                                                                                                      |           |
|                 | CP4_1131                             | toxin-antitoxin system, antitoxin component, Xre family             | 1205976 | 1206518 | 542                                                                          | None/None                                                                                                     | 0.82       |          |                                                                                                                      |           |
| CP4_1134        | conserved hypothetical protein       | 1208275                                                             | 1208493 | 218     | None/None                                                                    | 0.86                                                                                                          |            |          |                                                                                                                      |           |
|                 | CP4_1135                             | conserved hypothetical protein                                      | 1208934 | 1209164 | 230                                                                          | None/None                                                                                                     | 0.88       |          |                                                                                                                      |           |
|                 | CP4_1136                             | acetyltransferase                                                   | 1209487 | 1210803 | 1316                                                                         | None/None                                                                                                     | 0.82       |          |                                                                                                                      |           |
| VR-34           | CP4_1150                             | lipoprotein, putative                                               | 1225050 | 1225979 | 929                                                                          | None/None                                                                                                     | 0.80       |          |                                                                                                                      |           |
|                 | CP4_1153                             | conserved hypothetical protein                                      | 1226401 | 1227090 | 689                                                                          | None/None                                                                                                     | 0.88       |          |                                                                                                                      |           |
|                 | CP4_1154                             | conserved hypothetical protein                                      | 1227249 | 1227566 | 317                                                                          | None/None                                                                                                     | 0.81       |          |                                                                                                                      |           |
| CP4_1158        | conserved hypothetical protein       | 1229563                                                             | 1230120 | 557     | None/None                                                                    | 0.77                                                                                                          |            |          |                                                                                                                      |           |
| CP4_1159        | conserved hypothetical protein       | 1230670                                                             | 1231020 | 350     | None/None                                                                    | 0.89                                                                                                          |            |          |                                                                                                                      |           |
| CP4_1165        | UBA/TIS-N domain-containing protein  | 1235711                                                             | 1236259 | 548     | None/None                                                                    | 0.86                                                                                                          |            |          |                                                                                                                      |           |
| CP4_1167        | sensor histidine kinase              | 1236962                                                             | 1238218 | 1256    | None/None                                                                    | 0.89                                                                                                          |            |          |                                                                                                                      |           |
| VR-35           | CP4_1169                             | acetyltransferase                                                   | 1239436 | 1239996 | 560                                                                          | None/None                                                                                                     | 0.83       |          |                                                                                                                      |           |
|                 | CP4_1181                             | discodin domain-containing protein                                  | 1249401 | 1255829 | 6428                                                                         | None/None                                                                                                     | 0.47       |          |                                                                                                                      |           |
|                 | CP4_1184                             | [Fe] hydrogenase                                                    | 1258112 | 1259617 | 1505                                                                         | Stress Response/Oxidative stress<br>Stress Response/Rubrythrin                                                | 0.88       |          |                                                                                                                      |           |
| VR-36           | CP4_1238                             | collagen adhesion protein                                           | 1316719 | 1320288 | 3569                                                                         | None/None                                                                                                     | 0.88       |          |                                                                                                                      |           |
| VR-37           | CP4_1251                             | hydroxylamine reductase                                             | 1333284 | 1334939 | 1655                                                                         | Nitrogen Metabolism/Nitrosative stress                                                                        | 0.68       |          |                                                                                                                      |           |
| VR-38           | CP4_1323                             | lipoprotein-releasing system ATP-binding protein LoD                | 1407692 | 1408357 | 665                                                                          | None/None                                                                                                     | 0.87       |          |                                                                                                                      |           |
| CP4_1324        | conserved hypothetical protein       | 1408413                                                             | 1409330 | 917     | None/None                                                                    | 0.86                                                                                                          |            |          |                                                                                                                      |           |
|                 | CP4_1325                             | putative permease                                                   | 1409341 | 1410636 | 1295                                                                         | None/None                                                                                                     | 0.71       |          |                                                                                                                      |           |
|                 | CP4_1329                             | nudix family hydrolase                                              | 1413140 | 1413754 | 614                                                                          | None/None                                                                                                     | 0.86       |          |                                                                                                                      |           |
| VR-39           | CP4_1336                             | histidine kinase KlpD                                               | 1420205 | 1422907 | 2702                                                                         | Potassium metabolism/Potassium homeostasis                                                                    | 0.89       |          |                                                                                                                      |           |
|                 | CP4_1342                             | conserved hypothetical protein                                      | 1427580 | 1427702 | 122                                                                          | None/None                                                                                                     | 0.87       |          |                                                                                                                      |           |
| VR-40           | CP4_1388                             | ggd/feal domain-containing protein                                  | 1482643 | 1484166 | 1523                                                                         | Stress Response/Bacterial hemoglobins                                                                         | 0.89       |          |                                                                                                                      |           |
| VR-41           | CP4_1461                             | AP endonuclease                                                     | 1553838 | 1554656 | 818                                                                          | DNA Metabolism/DNA repair, bacterial                                                                          | 0.88       |          |                                                                                                                      |           |
| VR-42           | CP4_1477                             | lipoprotein, putative                                               | 1568892 | 1569686 | 794                                                                          | None/None                                                                                                     | 0.82       |          |                                                                                                                      |           |
| VR-43           | CP4_1594                             | chromosome segregation ATPase                                       | 1689390 | 1690826 | 1436                                                                         | None/None                                                                                                     | 0.51       |          |                                                                                                                      |           |
| VR-44           | CP4_1608                             | conserved hypothetical protein                                      | 1706749 | 1707519 | 770                                                                          | None/None                                                                                                     | 0.73       |          |                                                                                                                      |           |
| VR-45           | CP4_1619                             | lysine-N-methylase                                                  | 1723665 | 1724813 | 1148                                                                         | None/None                                                                                                     | 0.79       |          |                                                                                                                      |           |
| VR-46           | CP4_1641                             | xanthine phosphoribosyltransferase                                  | 1756609 | 1757187 | 578                                                                          | Nucleosides and Nucleotides/Purine conversions<br>Nucleosides and Nucleotides/Xanthine Metabolism in Bacteria | 0.89       |          |                                                                                                                      |           |
| VR-47           | CP4_1710                             | conserved hypothetical protein                                      | 1832279 | 1832653 | 374                                                                          | None/None                                                                                                     | 0.89       |          |                                                                                                                      |           |
| VR-48           | CP4_1730                             | transposon, resolvase                                               | 1852098 | 1852250 | 152                                                                          | None/None                                                                                                     | 0.70       | Yes      |                                                                                                                      |           |
| VR-49           | CP4_1860                             | BNR/Asp-box repeat-containing protein                               | 1984235 | 1985950 | 1715                                                                         | None/None                                                                                                     | 0.74       |          |                                                                                                                      |           |
| VR-50           | CP4_1876                             | O-GlcNAcase NagJ [CPE_1523]                                         | 2004673 | 2008056 | 3383                                                                         | None/None                                                                                                     | 0.82       |          |                                                                                                                      |           |
| VR-51           | CP4_1926                             | lipoprotein, putative                                               | 2064007 | 2064708 | 701                                                                          | None/None                                                                                                     | 0.86       |          |                                                                                                                      |           |
| VR-52           | CP4_1976                             | hypothetical protein                                                | 2115311 | 2115814 | 503                                                                          | None/None                                                                                                     | 0.73       |          |                                                                                                                      |           |
| VR-53           | CP4_2009                             | conserved hypothetical protein                                      | 2151691 | 2152023 | 332                                                                          | None/None                                                                                                     | 0.89       |          |                                                                                                                      |           |
| VR-54           | CP4_2074                             | chromosome segregation protein SMC                                  | 2218087 | 2221644 | 3557                                                                         | DNA Metabolism/DNA structural proteins, bacterial                                                             | 0.88       |          |                                                                                                                      |           |
| VR-55           | CP4_2126                             | penicillin binding protein transpeptidase domain-containing protein | 2272364 | 2274031 | 1667                                                                         | None/None                                                                                                     | 0.89       |          |                                                                                                                      |           |
| VR-56           | CP4_2168                             | conserved hypothetical protein                                      | 2315919 | 2316224 | 305                                                                          | None/None                                                                                                     | 0.89       |          |                                                                                                                      |           |
| VR-57           | CP4_2195                             | sensor histidine kinase                                             | 2336562 | 2336912 | 350                                                                          | None/None                                                                                                     | 0.87       |          |                                                                                                                      |           |
|                 | CP4_2196                             | conserved hypothetical protein                                      | 2336959 | 2337255 | 296                                                                          | None/None                                                                                                     | 0.74       |          |                                                                                                                      |           |
| VR-58           | CP4_2309                             | flavochemoprotein                                                   | 2465252 | 2465686 | 434                                                                          | Stress Response/Bacterial hemoglobins                                                                         | 0.90       |          |                                                                                                                      |           |
| VR-59           | CP4_2359                             | hypothetical protein                                                | 2516454 | 2516582 | 128                                                                          | None/None                                                                                                     | 0.33       |          |                                                                                                                      |           |
| VR-60           | CP4_2372                             | Gp10 protein                                                        | 2530832 | 2531182 | 350                                                                          | None/None                                                                                                     | 0.34       | Yes      |                                                                                                                      |           |
|                 | CP4_2376                             | phage major capsid protein, HK97 family                             | 2532246 | 2533430 | 1184                                                                         | Phages, Prophages, Transposable elements, Plasmids/Phage capsid proteins                                      | 0.29       | Yes      |                                                                                                                      |           |
|                 | CP4_2377                             | phage prohead protease, HK97 family                                 | 2533471 | 2534076 | 605                                                                          | None/None                                                                                                     | 0.24       | Yes      |                                                                                                                      |           |
| CP4_2379        | phage portal protein, HK97 family    | 2534232                                                             | 2535479 | 1247    | Phages, Prophages, Transposable elements, Plasmids/Phage packaging machinery | 0.33                                                                                                          | Yes        |          |                                                                                                                      |           |
| VR-61           | CP4_2382                             | Gp50 protein                                                        | 2537815 | 2538237 | 422                                                                          | None/None                                                                                                     | 0.23       | Yes      |                                                                                                                      |           |
| VR-62           | CP4_2398                             | integrase family protein                                            | 2545360 | 2546520 | 1160                                                                         | None/None                                                                                                     | 0.28       | Yes      |                                                                                                                      |           |
| VR-62           | CP4_2429                             | VanZ family membrane protein                                        | 2573948 | 2574463 | 515                                                                          | None/None                                                                                                     | 0.68       |          |                                                                                                                      |           |
|                 | CP4_2431                             | conserved hypothetical protein                                      | 2574989 | 2576170 | 1181                                                                         | None/None                                                                                                     | 0.45       |          |                                                                                                                      |           |
|                 | CP4_2432                             | membrane protein, putative                                          | 2576184 | 2577008 | 824                                                                          | None/None                                                                                                     | 0.70       |          |                                                                                                                      |           |
| CP4_2433        | ABC transporter, ATP-binding protein | 2576995                                                             | 2577690 | 695     | None/None                                                                    | 0.50                                                                                                          |            |          |                                                                                                                      |           |
| VR-63           | CP4_2512                             | conserved hypothetical protein                                      | 2672144 | 2673389 | 3245                                                                         | None/None                                                                                                     | 0.85       |          |                                                                                                                      |           |
| VR-64           | CP4_2645                             | sporulation initiation inhibitor protein Soj                        | 2816355 | 2817110 | 755                                                                          | Cell Division and Cell Cycle/Bacterial Cytoskeleton                                                           | 0.58       |          | NP_149993.1_Soj_protein_[Clostridium_perfringens_str_13] (99.6% coverage, 86.4% ID)                                  |           |
| VR-65           | CP4_2697                             | conserved hypothetical protein                                      | 2874962 | 2877589 | 2627                                                                         | None/None                                                                                                     | 0.69       |          |                                                                                                                      |           |
|                 | CP4_2699                             | conserved hypothetical protein                                      | 2878199 | 2880307 | 2108                                                                         | None/None                                                                                                     | 0.76       |          |                                                                                                                      |           |
|                 | CP4_2700                             | conserved hypothetical protein                                      | 2880312 | 2881313 | 1001                                                                         | None/None                                                                                                     | 0.83       |          |                                                                                                                      |           |
| VR-66           | CP4_2736                             | type I restriction-modification system, M subunit                   | 2920302 | 2921819 | 1517                                                                         | DNA Metabolism/Restriction-Modification System                                                                | 0.47       |          |                                                                                                                      |           |
| VR-67           | CP4_2932                             | DNA-binding protein HU                                              | 3106077 | 3106352 | 275                                                                          | DNA Metabolism/DNA structural proteins, bacterial                                                             | 0.88       |          |                                                                                                                      |           |
| VR-68           | CP4_3079                             | AraC family transcriptional regulator                               | 3263120 | 3263989 | 869                                                                          | None/None                                                                                                     | 0.68       |          | YP_001967745.1_probable_AraC-related_transcriptional_regulator_[Clostridium_perfringens ns] (100% coverage, 100% ID) |           |

Table S3. Variable genes identified among 63 poultry and non-poultry isolates.

| Variable Region | Locus_tag | Product                                                      | Start   | Stop    | Size (bp) | Functional Category/Subcategory                                                  | Prevalence | phage/IS | Plasmid Hit                                                                                                                   | pNet8 Hit                                                                                                                  |
|-----------------|-----------|--------------------------------------------------------------|---------|---------|-----------|----------------------------------------------------------------------------------|------------|----------|-------------------------------------------------------------------------------------------------------------------------------|----------------------------------------------------------------------------------------------------------------------------|
|                 | CP4_3080  | tetracycline resistance protein TetP                         | 3264910 | 3268688 | 1958      | Virulence, Disease and Defense/Tetracycline resistance, ribosome protection type | 0.77       |          | YP_001967743.1_ribosomal_protection-like_tetracycline_resistance_protein_[Clostridium_perfringens] (100% coverage, 99.54% ID) |                                                                                                                            |
|                 | CP4_3081  | tetracycline resistance protein                              | 3266852 | 3268114 | 1262      | None/None                                                                        | 0.89       |          | YP_001967742.1_tetracycline_efflux_protein_[Clostridium_perfringens] (100% coverage, 97.86% ID)                               |                                                                                                                            |
| VR-69           | CP4_3109  | conserved hypothetical protein (pCP13_CPC36)                 | 3284906 | 3286732 | 1826      | None/None                                                                        | 0.45       |          |                                                                                                                               |                                                                                                                            |
| VR-70           | CP4_3124  | conserved hypothetical protein (pCW3_0007)                   | 3291941 | 3292597 | 656       | None/None                                                                        | 0.68       |          | YP_001967748.1_hypothetical_protein_pCW3_0007_[Clostridium_perfringens] (100% coverage, 99.68% ID)                            |                                                                                                                            |
|                 | CP4_3125  | hypothetical protein                                         | 3292630 | 3292746 | 116       | None/None                                                                        | 0.73       |          |                                                                                                                               |                                                                                                                            |
|                 | CP4_3127  | conserved hypothetical protein (pCW3_0008)                   | 3293069 | 3293230 | 161       | None/None                                                                        | 0.76       |          | YP_001967749.1_hypothetical_protein_pCW3_0008_[Clostridium_perfringens] (100% coverage, 100% ID)                              | AEP94979.1_hypothetical_protein_pNet8_00001_[Conjugative_transfer_vector_pNet8::catP] (100% coverage, 92.59% ID)           |
| VR-71           | CP4_3126  | LexA repressor (pCW3_0015)                                   | 3293270 | 3293829 | 559       | None/None                                                                        | 0.69       | Yes      | YP_001967756.1_probable_transcriptional_regulator_[Clostridium_perfringens] (100% coverage, 100% ID)                          |                                                                                                                            |
| VR-72           | CP4_3128  | putative plasmid partitioning protein (pCW3_0013)            | 3294331 | 3295257 | 926       | None/None                                                                        | 0.71       |          | YP_001967754.1_possible_plasmid_partitioning_protein_[Clostridium_perfringens] (100% coverage, 99.68% ID)                     |                                                                                                                            |
|                 | CP4_3129  | conserved hypothetical protein (pCW3_0012)                   | 3295236 | 3295466 | 230       | None/None                                                                        | 0.62       |          | YP_001967753.1_hypothetical_protein_pCW3_0012_[Clostridium_perfringens] (100% coverage, 100% ID)                              |                                                                                                                            |
| VR-73           | CP4_3132  | toxin A                                                      | 3297965 | 3301840 | 3875      | None/None                                                                        | 0.84       |          |                                                                                                                               |                                                                                                                            |
|                 | CP4_3133  | bacteriocin-related protein                                  | 3302060 | 3302257 | 197       | None/None                                                                        | 0.56       |          | YP_699914.1_bacteriocin-related_protein_[Clostridium_perfringens_SM101] (100% coverage, 86.15% ID)                            |                                                                                                                            |
|                 | CP4_3134  | UviA protein                                                 | 3302301 | 3302867 | 566       | None/None                                                                        | 0.33       | Yes      |                                                                                                                               |                                                                                                                            |
|                 | CP4_3136  | transposase for insertion sequence element isrm3             | 3304270 | 3304389 | 119       | None/None                                                                        | 0.19       |          |                                                                                                                               |                                                                                                                            |
| VR-74           | CP4_3138  | putative ATPase of HSP70 class (pNet8_00004)                 | 3305250 | 3306095 | 845       | None/None                                                                        | 0.86       |          | AEP94982.1_putative_ATPase_[Conjugative_transfer_vector_pNet8::catP] (100% coverage, 99.64% ID)                               | AEP94982.1_putative_ATPase_[Conjugative_transfer_vector_pNet8::catP] (100% coverage, 99.64% ID)                            |
|                 | CP4_3139  | conserved hypothetical protein (pNet8_00003)                 | 3306098 | 3306349 | 251       | None/None                                                                        | 0.52       |          | AEP94981.1_hypothetical_protein_pNet8_00003_[Conjugative_transfer_vector_pNet8::catP] (100% coverage, 100% ID)                | AEP94981.1_hypothetical_protein_pNet8_00003_[Conjugative_transfer_vector_pNet8::catP] (100% coverage, 100% ID)             |
| VR-75           | CP4_3153  | thymidine kinase                                             | 3312878 | 3313459 | 581       | Nucleosides and Nucleotides/pyrimidine conversions                               | 0.51       | Yes      |                                                                                                                               |                                                                                                                            |
| VR-76           | CP4_3216  | conserved hypothetical protein                               | 3372021 | 3372323 | 302       | None/None                                                                        | 0.80       |          |                                                                                                                               |                                                                                                                            |
| VR-77           | CP4_3229  | conserved hypothetical protein                               | 3378524 | 3379292 | 768       | None/None                                                                        | 0.52       |          |                                                                                                                               |                                                                                                                            |
| VR-78           | CP4_3246  | ISCpe2, transposase OrfB                                     | 3385854 | 3387008 | 1154      | None/None                                                                        | 0.32       | Yes      |                                                                                                                               |                                                                                                                            |
| VR-79           | CP4_3270  | conserved hypothetical protein                               | 3398974 | 3399285 | 311       | None/None                                                                        | 0.86       |          |                                                                                                                               |                                                                                                                            |
|                 | CP4_3271  | putative transcriptional regulator                           | 3399534 | 3399743 | 209       | None/None                                                                        | 0.31       | Yes      |                                                                                                                               |                                                                                                                            |
| VR-80           | CP4_3286  | conserved hypothetical protein                               | 3410751 | 3411494 | 743       | None/None                                                                        | 0.29       |          |                                                                                                                               |                                                                                                                            |
| VR-81           | CP4_3340  | plectrovirus Spv1-c74 orf 1 and c-terminal truncated protein | 3456498 | 3456671 | 173       | None/None                                                                        | 0.39       |          |                                                                                                                               |                                                                                                                            |
| VR-82           | CP4_3348  | collagen adhesion protein                                    | 3460957 | 3462036 | 1079      | None/None                                                                        | 0.24       |          |                                                                                                                               |                                                                                                                            |
| VR-83           | CP4_3359  | conserved hypothetical protein                               | 3469944 | 3471065 | 1121      | None/None                                                                        | 0.51       |          |                                                                                                                               |                                                                                                                            |
|                 | CP4_3360  | collagen adhesin (partial)                                   | 3471309 | 3474698 | 3389      | None/None                                                                        | 0.76       |          | NP_150050.1_collagen_adhesin_[Clostridium_perfringens_str_13] (99.65% coverage, 92.63% ID)                                    |                                                                                                                            |
| VR-84           | CP4_3361  | collagen adhesin (partial)                                   | 3474737 | 3475402 | 665       | None/None                                                                        | 0.42       |          | NP_150050.1_collagen_adhesin_[Clostridium_perfringens_str_13] (99.1% coverage, 88.58% ID)                                     |                                                                                                                            |
| VR-85           | CP4_3398  | HNH endonuclease domain protein                              | 3503059 | 3503517 | 458       | None/None                                                                        | 0.49       | Yes      |                                                                                                                               |                                                                                                                            |
|                 | CP4_3403  | phage prohead protease, HK97 family                          | 3507336 | 3507926 | 590       | None/None                                                                        | 0.73       | Yes      |                                                                                                                               |                                                                                                                            |
|                 | CP4_3404  | phage major capsid protein, HK97 family                      | 3507984 | 3509102 | 1118      | Phages, Prophages, Transposable elements, Plasmids/Phage                         | 0.23       | Yes      |                                                                                                                               |                                                                                                                            |
|                 | CP4_3406  | phage protein, HK97 gp10 family                              | 3509754 | 3510107 | 353       | None/None                                                                        | 0.71       |          |                                                                                                                               |                                                                                                                            |
|                 | CP4_3407  | conserved hypothetical protein                               | 3510107 | 3510457 | 350       | None/None                                                                        | 0.66       |          |                                                                                                                               |                                                                                                                            |
|                 | CP4_3408  | prophage LambdaSa04, Phi13 family major tail protein         | 3510503 | 3511090 | 587       | None/None                                                                        | 0.58       |          |                                                                                                                               |                                                                                                                            |
|                 | CP4_3411  | family phage tail tape measure protein                       | 3511831 | 3515166 | 3335      | Phages, Prophages, Transposable elements, Plasmids/Phage tail proteins           | 0.48       | Yes      |                                                                                                                               |                                                                                                                            |
| VR-86           | CP4_3421  | FtsK/Spol                                                    | 3519170 | 3520486 | 1316      | None/None                                                                        | 0.49       | Yes      | YP_473424.1_FtsK/Spol_[Clostridium_perfringens] (100% coverage, 99.32% ID)                                                    |                                                                                                                            |
| VR-87           | CP4_3422  | integrase/recombinase                                        | 3520758 | 3521774 | 1016      | None/None                                                                        | 0.84       |          |                                                                                                                               |                                                                                                                            |
|                 | CP4_3426  | hypothetical protein                                         | 3523520 | 3524119 | 599       | None/None                                                                        | 0.25       |          |                                                                                                                               |                                                                                                                            |
| VR-88           | CP4_3431  | LexA repressor                                               | 3525594 | 3525998 | 404       | None/None                                                                        | 0.51       | Yes      | AEP94898.1_putative_transcription_regulator_[Clostridium_perfringens] (100% coverage, 99.25% ID)                              |                                                                                                                            |
| VR-89           | CP4_3432  | transporter, major facilitator family                        | 3526521 | 3527768 | 1247      | None/None                                                                        | 0.34       |          |                                                                                                                               |                                                                                                                            |
|                 | CP4_3433  | putative heme biosynthesis protein                           | 3527773 | 3528915 | 1142      | None/None                                                                        | 0.25       |          |                                                                                                                               |                                                                                                                            |
|                 | CP4_3434  | putative radical SAM domain-containing protein               | 3528930 | 3530042 | 1112      | None/None                                                                        | 0.53       |          |                                                                                                                               |                                                                                                                            |
|                 | CP4_3435  | conserved hypothetical protein                               | 3530064 | 3530258 | 194       | None/None                                                                        | 0.33       |          |                                                                                                                               |                                                                                                                            |
| VR-90           | CP4_3436  | conserved hypothetical protein                               | 3531541 | 3531810 | 269       | None/None                                                                        | 0.40       |          | AEP94894.1_hypothetical_protein_pBeta2_00004_[Clostridium_perfringens] (100% coverage, 97.75% ID)                             |                                                                                                                            |
|                 | CP4_3437  | conserved hypothetical protein                               | 3531847 | 3532185 | 338       | None/None                                                                        | 0.62       |          | AEP94895.1_hypothetical_protein_pBeta2_00005_[Clostridium_perfringens] (100% coverage, 100% ID)                               |                                                                                                                            |
|                 | CP4_3438  | putative ATPase                                              | 3532185 | 3533102 | 917       | None/None                                                                        | 0.71       |          | AEP94896.1_putative_ATPase_[Clostridium_perfringens] (100% coverage, 100% ID)                                                 |                                                                                                                            |
| VR-91           | CP4_3439  | transcriptional regulator                                    | 3534507 | 3534830 | 323       | None/None                                                                        | 0.82       |          | AEP94973.1_transcriptional_regulator_[Clostridium_perfringens] (100% coverage, 99.07% ID)                                     |                                                                                                                            |
|                 | CP4_3441  | beta2 toxin                                                  | 3535486 | 3536283 | 797       | None/None                                                                        | 0.61       |          | AEP94971.1_beta2-toxin_[Clostridium_perfringens] (100% coverage, 100% ID)                                                     |                                                                                                                            |
| VR-92           | CP4_3442  | transcriptional regulator, MarR family                       | 3537230 | 3537676 | 446       | Stress Response/Oxidative stress                                                 | 0.39       |          | AEP95056.1_transcriptional_regulator_[Conjugative_transfer_vector_pNet8::catP] (100% coverage, 100% ID)                       | AEP95056.1_transcriptional_regulator_[Conjugative_transfer_vector_pNet8::catP] (100% coverage, 100% ID)                    |
|                 | CP4_3443  | beta-lactamase domain-containing protein                     | 3537812 | 3538561 | 749       | None/None                                                                        | 0.48       |          | AEP95055.1_beta-lactamase_domain-containing_protein_[Conjugative_transfer_vector_pNet8::catP] (100% coverage, 100% ID)        | AEP95055.1_beta-lactamase_domain-containing_protein_[Conjugative_transfer_vector_pNet8::catP] (100% coverage, 100% ID)     |
|                 | CP4_3444  | M protein trans-acting positive regulator (MGA)              | 3539337 | 3540827 | 1490      | None/None                                                                        | 0.34       |          | AEP95054.1_hypothetical_protein_pNet8_00081_[Conjugative_transfer_vector_pNet8::catP] (100% coverage, 100% ID)                | AEP95054.1_hypothetical_protein_pNet8_00081_[Conjugative_transfer_vector_pNet8::catP] (100% coverage, 100% ID)             |
|                 | CP4_3445  | putative radical SAM domain-containing protein               | 3540991 | 3542247 | 1256      | None/None                                                                        | 0.34       |          | AEP95053.1_SAM_domain-containing_protein_[Conjugative_transfer_vector_pNet8::catP] (100% coverage, 100% ID)                   | AEP95053.1_SAM_domain-containing_protein_[Conjugative_transfer_vector_pNet8::catP] (100% coverage, 100% ID)                |
|                 | CP4_3446  | putative internalin                                          | 3542876 | 3544051 | 1175      | None/None                                                                        | 0.29       |          | AEP95052.1_putative_surface_protein_Net1_[Conjugative_transfer_vector_pNet8::catP] (100% coverage, 100% ID)                   | AEP95052.1_putative_surface_protein_Net1_[Conjugative_transfer_vector_pNet8::catP] (100% coverage, 100% ID)                |
|                 | CP4_3447  | hypothetical protein                                         | 3544300 | 3544443 | 143       | None/None                                                                        | 0.36       |          | AEP95051.1_hypothetical_protein_pNet8_00078_[Conjugative_transfer_vector_pNet8::catP] (100% coverage, 100% ID)                | AEP95051.1_hypothetical_protein_pNet8_00078_[Conjugative_transfer_vector_pNet8::catP] (100% coverage, 100% ID)             |
|                 | CP4_3448  | hypothetical protein                                         | 3544427 | 3544555 | 128       | None/None                                                                        | 0.47       |          | AEP95050.1_hypothetical_protein_pNet8_00077_[Conjugative_transfer_vector_pNet8::catP] (100% coverage, 100% ID)                | AEP95050.1_hypothetical_protein_pNet8_00077_[Conjugative_transfer_vector_pNet8::catP] (100% coverage, 100% ID)             |
|                 | CP4_3449  | necrotic enteritis toxin B                                   | 3544776 | 3545744 | 968       | None/None                                                                        | 0.42       |          |                                                                                                                               |                                                                                                                            |
|                 | CP4_3450  | ricin-type beta-trefoil domain protein                       | 3546298 | 3547473 | 1175      | None/None                                                                        | 0.70       | Yes      | AEP95047.1_putative_carbohydrate_binding_protein_NetH_[Conjugative_transfer_vector_pNet8::catP] (100% coverage, 99.74% ID)    | AEP95047.1_putative_carbohydrate_binding_protein_NetH_[Conjugative_transfer_vector_pNet8::catP] (100% coverage, 99.74% ID) |
|                 | CP4_3451  | transposase for transposon                                   | 3548149 | 3548430 | 281       | None/None                                                                        | 0.52       |          |                                                                                                                               |                                                                                                                            |

Table S3. Variable genes identified among 63 poultry and non-poultry isolates.

| Variable Region | Locus_tag    | Product                                                   | Start   | Stop    | Size (bp) | Functional Category/Subcategory                                                                                                               | Prevalence | phage/S | Plasmid Hit                                                                                                              | pNet8 Hit                                                                                                                |
|-----------------|--------------|-----------------------------------------------------------|---------|---------|-----------|-----------------------------------------------------------------------------------------------------------------------------------------------|------------|---------|--------------------------------------------------------------------------------------------------------------------------|--------------------------------------------------------------------------------------------------------------------------|
|                 | CP4_3452     | hypothetical protein                                      | 3548798 | 3549127 | 329       | None/None                                                                                                                                     | 0.65       |         | YP_001967791.1_hypothetical_protein_pCW3_0050_[Clostridium_perfringens] (100% coverage, 93.64% ID)                       | AEP95046.1_putative_transposase_[Conjugative_transfer_vector_pNet8::catP] (100% coverage, 100% ID)                       |
|                 | CP4_3453     | hypothetical protein                                      | 3549134 | 3549613 | 479       | None/None                                                                                                                                     | 0.59       |         | BAE79145.1_hypothetical_protein_[Clostridium_perfringens] (100% coverage, 97.5% ID)                                      | AEP95019.1_nuclease_family_transposase_[Conjugative_transfer_vector_pNet8::catP] (100% coverage, 96.88% ID)              |
|                 | CP4_3454     | chitinase B                                               | 3550620 | 3552419 | 1799      | Carbohydrates/Chitin and N-acetylglucosamine utilization                                                                                      | 0.38       |         | AEP95045.1_glycosyl_hydrolase_[Conjugative_transfer_vector_pNet8::catP] (100% coverage, 99.83% ID)                       | AEP95045.1_glycosyl_hydrolase_[Conjugative_transfer_vector_pNet8::catP] (100% coverage, 99.83% ID)                       |
|                 | CP4_3455     | chitin deacetylase                                        | 3552505 | 3554340 | 1835      | Carbohydrates/Chitin and N-acetylglucosamine utilization                                                                                      | 0.39       |         | AEP95044.1_glycosyl_hydrolase_[Conjugative_transfer_vector_pNet8::catP] (100% coverage, 99.84% ID)                       | AEP95044.1_glycosyl_hydrolase_[Conjugative_transfer_vector_pNet8::catP] (100% coverage, 99.84% ID)                       |
|                 | CP4_3456     | protein Tlet_1264                                         | 3554782 | 3555102 | 320       | None/None                                                                                                                                     | 0.76       |         | AEP95043.1_hypothetical_protein_pNet8_00067_[Conjugative_transfer_v                                                      | AEP95043.1_hypothetical_protein_pNet8_00067_[Conjugative_transfer_v                                                      |
|                 | CP4_3457     | CAAX amino terminal protease family                       | 3555378 | 3556232 | 854       | None/None                                                                                                                                     | 0.41       |         | ector_pNet8::catP] (100% coverage, 100% ID)                                                                              | ector_pNet8::catP] (100% coverage, 100% ID)                                                                              |
|                 | CP4_3458     | putative beta-toxin                                       | 3556453 | 3556743 | 290       | None/None                                                                                                                                     | 0.32       |         | AEP95042.1_CAAX_amino_terminal_protease_family_protein_[Conjugative                                                      | AEP95042.1_CAAX_amino_terminal_protease_family_protein_[Conjugative                                                      |
|                 | CP4_3459     | putative beta-toxin                                       | 3556870 | 3557214 | 344       | None/None                                                                                                                                     | 0.34       |         | _transfer_vector_pNet8::catP] (100% coverage, 99.65% ID)                                                                 | _transfer_vector_pNet8::catP] (100% coverage, 99.65% ID)                                                                 |
|                 | CP4_3460     | conserved hypothetical protein                            | 3557874 | 3558050 | 176       | None/None                                                                                                                                     | 0.54       |         | AEP95041.1_pore-forming_toxin_Net8_[part]_[Conjugative_transfer_vector_p                                                 | AEP95041.1_pore-forming_toxin_Net8_[part]_[Conjugative_transfer_vector_p                                                 |
|                 | CP4_3461     | conserved hypothetical protein                            | 3558419 | 3558619 | 200       | None/None                                                                                                                                     | 0.37       |         | Net8::catP] (96.49% coverage, 99.09% ID)                                                                                 | Net8::catP] (96.49% coverage, 99.09% ID)                                                                                 |
|                 | CP4_3462     | conserved hypothetical protein                            | 3559076 | 3559678 | 602       | None/None                                                                                                                                     | 0.66       |         | AEP95039.1_hypothetical_protein_pNet8_00063_[Conjugative_transfer                                                        | AEP95039.1_hypothetical_protein_pNet8_00063_[Conjugative_transfer                                                        |
|                 | CP4_3464     | resolvase/recombinase                                     | 3560522 | 3560635 | 113       | None/None                                                                                                                                     | 0.59       |         | _vector_pNet8::catP] (100% coverage, 98.28% ID)                                                                          | _vector_pNet8::catP] (100% coverage, 98.28% ID)                                                                          |
|                 | CP4_3465     | resolvase/recombinase                                     | 3560669 | 3560887 | 218       | None/None                                                                                                                                     | 0.48       |         | AEP95038.1_hypothetical_protein_pNet8_00062_[Conjugative_transfer                                                        | AEP95038.1_hypothetical_protein_pNet8_00062_[Conjugative_transfer                                                        |
|                 | CP4_3466     | membrane protein, putative                                | 3561094 | 3563193 | 2099      | None/None                                                                                                                                     | 0.58       |         | _vector_pNet8::catP] (100% coverage, 98.48% ID)                                                                          | _vector_pNet8::catP] (100% coverage, 98.48% ID)                                                                          |
|                 | CP4_3468     | F5/8 type C domain-containing protein                     | 3563893 | 3568830 | 4937      | None/None                                                                                                                                     | 0.62       |         | AEP95037.1_hypothetical_protein_pNet8_00061_[Conjugative_transfer_v                                                      | AEP95037.1_hypothetical_protein_pNet8_00061_[Conjugative_transfer_v                                                      |
|                 | CP4_3469     | diguanylate cyclase/phosphodiesterase domain 2            | 3569337 | 3570689 | 1352      | Stress Response/Bacterial hemoglobins                                                                                                         | 0.45       |         | ector_pNet8::catP] (100% coverage, 99% ID)                                                                               | ector_pNet8::catP] (100% coverage, 99% ID)                                                                               |
|                 | CP4_3470     | sortase family protein                                    | 3570743 | 3571537 | 794       | None/None<br>Cell Wall and Capsule/Sortase<br>Iron acquisition and metabolism/Heme, hemin uptake and<br>utilization systems in Gram-positives | 0.41       |         | AEP94940.1_resolvase_[Clostridium_perfringens] (100% coverage, 100% ID)                                                  | AEP94940.1_resolvase_[Clostridium_perfringens] (100% coverage, 100% ID)                                                  |
|                 | CP4_3471     | putative surface protein                                  | 3571648 | 3573678 | 2030      | None/None<br>Cell Wall and Capsule/Sortase                                                                                                    | 0.62       |         | AEP95034.1_resolvase_[Conjugative_transfer_vector_pNet8::catP] (100% coverage, 98.63% ID)                                | AEP95034.1_resolvase_[Conjugative_transfer_vector_pNet8::catP] (100% coverage, 98.63% ID)                                |
|                 | CP4_3472     | peptidoglycan bound protein                               | 3573723 | 3574820 | 1097      | None/None                                                                                                                                     | 0.47       |         | AEP95033.1_lysoyl-tRNA_synthetase_[Conjugative_transfer_vector_pNet8::catP ]                                             | AEP95033.1_lysoyl-tRNA_synthetase_[Conjugative_transfer_vector_pNet8::catP ]                                             |
|                 | CP4_3473     | cell wall surface anchor family protein                   | 3574931 | 3575449 | 518       | None/None                                                                                                                                     | 0.53       |         | (100% coverage, 99.86% ID)                                                                                               | (100% coverage, 99.86% ID)                                                                                               |
|                 | CP4_3474     | signal peptidase I                                        | 3576462 | 3576596 | 134       | Protein Metabolism/Signal peptidase                                                                                                           | 0.74       |         | AEP95031.1_F5/8_type_C_domain-containing_protein_[Conjugative_transfer_vector_pNet8::ca tP] (98.24% coverage, 91.65% ID) | AEP95031.1_F5/8_type_C_domain-containing_protein_[Conjugative_transfer_vector_pNet8::ca tP] (98.24% coverage, 91.65% ID) |
|                 | CP4_3476     | hypothetical protein                                      | 3577283 | 3577429 | 146       | None/None                                                                                                                                     | 0.35       |         | AEP95030.1_putative_diguanylate_cyclase_[Conjugative_transfer_vecto                                                      | AEP95030.1_putative_diguanylate_cyclase_[Conjugative_transfer vecto                                                      |
|                 | CP4_3477     | swim zinc finger domain protein                           | 3577548 | 3577712 | 164       | None/None                                                                                                                                     | 0.73       |         | r_pNet8::catP] (100% coverage, 100% ID)                                                                                  | r_pNet8::catP] (100% coverage, 100% ID)                                                                                  |
|                 | CP4_3478     | diguanylate cyclase/phosphodiesterase with PAS/PAC sensor | 3578197 | 3579249 | 1052      | None/None                                                                                                                                     | 0.38       |         | AEP94952.1_hypothetical_protein_pBeta2_00062_[Clostridium_perfringens ns] (100% coverage, 99.42% ID)                     | AEP94952.1_hypothetical_protein_pBeta2_00062_[Clostridium_perfringens ns] (100% coverage, 99.42% ID)                     |
| VR-93           | CP4_3522     | putative phage terminase, large subunit                   | 3604089 | 3605774 | 1685      | Phages, Prophages, Transposable elements, Plasmids/Phage packaging machinery                                                                  | 0.15       | Yes     | AEP95024.1_hypothetical_protein_pNet8_00048_[Conjugative_transfer                                                        | AEP95024.1_hypothetical_protein_pNet8_00048_[Conjugative_transfer                                                        |
| VR-94           | CP4_3559     | conserved hypothetical protein                            | 3629823 | 3630542 | 719       | None/None                                                                                                                                     | 0.53       |         | _vector_pNet8::catP] (100% coverage, 100% ID)                                                                            | _vector_pNet8::catP] (100% coverage, 100% ID)                                                                            |
|                 | CP4_3560     | conserved hypothetical protein                            | 3630617 | 3630937 | 320       | None/None                                                                                                                                     | 0.30       |         | AEP95026.1_cell_wall_surface_protein_[Conjugative_transfer_vector_p                                                      | AEP95026.1_cell_wall_surface_protein_[Conjugative_transfer_vector_p                                                      |
| VR-95           | CP4_3561     | putative ATPase                                           | 3631535 | 3632413 | 878       | None/None                                                                                                                                     | 0.89       |         | Net8::catP] (100% coverage, 96.71% ID)                                                                                   | Net8::catP] (100% coverage, 96.71% ID)                                                                                   |
|                 | CP4_3562     | immunoglobulin heavy chain variable region                | 3632416 | 3632709 | 293       | None/None                                                                                                                                     | 0.57       |         | AEP95025.1_hypothetical_protein_pNet8_00049_[Conjugative_transfer_v                                                      | AEP95025.1_hypothetical_protein_pNet8_00049_[Conjugative_transfer_v                                                      |
|                 | CP4_3563     | conserved hypothetical protein                            | 3632769 | 3633038 | 269       | None/None                                                                                                                                     | 0.58       |         | ector_pNet8::catP] (100% coverage, 98.26% ID)                                                                            | ector_pNet8::catP] (100% coverage, 98.26% ID)                                                                            |
| VR-96           | CP4_3564     | hypothetical protein                                      | 3633402 | 3633713 | 311       | None/None                                                                                                                                     | 0.88       |         | YP_002291138.1_putative_ATPase_[Clostridium_perfringens] (100% coverage, 100% ID)                                        | YP_002291138.1_putative_ATPase_[Clostridium_perfringens] (100% coverage, 100% ID)                                        |
|                 | CP4_3565     | hypothetical protein                                      | 3635359 | 3635868 | 509       | None/None                                                                                                                                     | 0.44       |         | AEP95022.1_hypothetical_protein_pNet8_00046_[Conjugative_transfer                                                        | AEP95022.1_hypothetical_protein_pNet8_00046_[Conjugative_transfer                                                        |
| VR-97           | CP4_3567     | conserved hypothetical protein                            | 3637457 | 3637909 | 452       | None/None                                                                                                                                     | 0.61       |         | _vector_pNet8::catP] (100% coverage, 100% ID)                                                                            | _vector_pNet8::catP] (100% coverage, 100% ID)                                                                            |
|                 | CP4_3568     | hypothetical protein                                      | 3638371 | 3639297 | 926       | None/None                                                                                                                                     | 0.47       |         | AEP95014.1_putative_amidoligase_enzyme_[Conjugative_transfer_vector                                                      | AEP95014.1_putative_amidoligase_enzyme_[Conjugative_transfer_vector                                                      |
|                 | CP4_3569     | resolvase/recombinase                                     | 3639501 | 3640142 | 641       | None/None                                                                                                                                     | 0.57       |         | pNet8::catP] (96.3% coverage, 92.31% ID)                                                                                 | pNet8::catP] (96.3% coverage, 92.31% ID)                                                                                 |
|                 | CP4_3570     | conserved hypothetical protein                            | 3640922 | 3641233 | 311       | None/None                                                                                                                                     | 0.74       |         | AEP95020.1_GDDEF_domain-containing_protein_[Conjugative_transfer_vector_pNet8::a tP] (100% coverage, 99.71% ID)          | AEP95020.1_GDDEF_domain-containing_protein_[Conjugative_transfer_vector_pNet8::a tP] (100% coverage, 99.71% ID)          |
|                 | CP4_3572     | NADP-dependent 7-alpha-hydroxysteroid dehydrogenase       | 3643156 | 3643944 | 788       | Fatty Acids, Lipids, and Isoprenoids/Fatty Acid Biosynthesis                                                                                  | 0.39       |         | AEP94941.1_hypothetical_protein_pBeta2_00059_[Clostridium_perfringens ns] (100% coverage, 100% ID)                       | AEP94941.1_hypothetical_protein_pBeta2_00059_[Clostridium_perfringens ns] (100% coverage, 100% ID)                       |
| VR-98           | JGS4143-0023 | phage integrase                                           | 24844   | 26043   | 1199      | None/None                                                                                                                                     | 0.65       | Yes     | AEP94940.1_resolvase_[Clostridium_perfringens] (100% coverage, 98.12% ID)                                                | AEP94940.1_resolvase_[Clostridium_perfringens] (100% coverage, 98.12% ID)                                                |
|                 | JGS4143-0024 | conserved hypothetical protein                            | 28488   | 28661   | 173       | None/None                                                                                                                                     | 0.48       |         | AEP94942.1_hypothetical_protein_pBeta2_00052_[Clostridium_perfringens ns] (100% coverage, 98.06% ID)                     | AEP94942.1_hypothetical_protein_pBeta2_00052_[Clostridium_perfringens ns] (100% coverage, 98.06% ID)                     |
|                 | JGS4143-0025 | phage protein                                             | 28799   | 29254   | 455       | None/None                                                                                                                                     | 0.32       | Yes     | AEP94944.1_short_chain_dehydrogenase_[Clostridium_perfringens] (100% coverage, 99.62% ID)                                | AEP94944.1_short_chain_dehydrogenase_[Clostridium_perfringens] (100% coverage, 99.62% ID)                                |
|                 | JGS4143-0026 | DNA-binding protein, putative                             | 29268   | 30465   | 872       | None/None                                                                                                                                     | 0.39       |         | AEP94943.1_hypothetical_protein_pBeta2_00049_[Clostridium_perfringens ns] (100% coverage, 100% ID)                       | AEP94943.1_hypothetical_protein_pBeta2_00049_[Clostridium_perfringens ns] (100% coverage, 100% ID)                       |
|                 | JGS4143-0027 | conserved domain protein                                  | 30307   | 30516   | 209       | None/None                                                                                                                                     | 0.51       |         | AEP94949.1_hypothetical_protein_pBeta2_00059_[Clostridium_perfringens ns] (100% coverage, 100% ID)                       | AEP94949.1_hypothetical_protein_pBeta2_00059_[Clostridium_perfringens ns] (100% coverage, 100% ID)                       |
|                 | JGS4143-0028 | DNA binding protein, excisionase family,                  | 30712   | 30936   | 224       | None/None                                                                                                                                     | 0.53       |         |                                                                                                                          |                                                                                                                          |
|                 | JGS4143-0029 | hypothetical protein                                      | 31090   | 32088   | 998       | None/None                                                                                                                                     | 0.56       |         |                                                                                                                          |                                                                                                                          |
|                 | JGS4143-0030 | replicative DNA helicase                                  | 32104   | 33405   | 1301      | DNA Metabolism/DNA-replication                                                                                                                | 0.56       | Yes     |                                                                                                                          |                                                                                                                          |
|                 | JGS4143-0031 | hypothetical protein                                      | 33418   | 33537   | 119       | None/None                                                                                                                                     | 0.63       |         |                                                                                                                          |                                                                                                                          |
|                 | JGS4143-0032 | kinetochore protein Nuf2 (Cell division)                  | 34063   | 34329   | 266       | None/None                                                                                                                                     | 0.30       |         |                                                                                                                          |                                                                                                                          |
|                 | JGS4143-0033 | hypothetical protein                                      | 34322   | 34465   | 143       | None/None                                                                                                                                     | 0.69       |         |                                                                                                                          |                                                                                                                          |
|                 | JGS4143-0035 | hypothetical protein                                      | 36525   | 36659   | 134       | None/None                                                                                                                                     | 0.66       |         |                                                                                                                          |                                                                                                                          |
|                 | JGS4143-0036 | hypothetical protein                                      | 36748   | 37260   | 512       | None/None                                                                                                                                     | 0.42       |         |                                                                                                                          |                                                                                                                          |
|                 | JGS4143-0037 | hypothetical protein                                      | 37605   | 38315   | 710       | None/None                                                                                                                                     | 0.42       |         |                                                                                                                          |                                                                                                                          |

Table S3. Variable genes identified among 63 poultry and non-poultry isolates.

| Variable Region | Locus_tag    | Product                                        | Start  | Stop   | Size (bp) | Functional Category/Subcategory                                                                                                  | Prevalence | phage/IS | Plasmid Hit | pNet8 Hit |
|-----------------|--------------|------------------------------------------------|--------|--------|-----------|----------------------------------------------------------------------------------------------------------------------------------|------------|----------|-------------|-----------|
|                 | JGS4143-0038 | RNA polymerase, sigma 32 subunit, RpoH         | 38315  | 38998  | 683       | RNA Metabolism/Transcription initiation, bacterial sigma factors<br>Cell Division and Cell Cycle/Macromolecular synthesis operon | 0.39       |          |             |           |
|                 | JGS4143-0039 | hypothetical protein                           | 39034  | 39396  | 362       | None/None                                                                                                                        | 0.35       |          |             |           |
|                 | JGS4143-0040 | conserved hypothetical protein                 | 39443  | 39703  | 260       | None/None                                                                                                                        | 0.32       |          |             |           |
|                 | JGS4143-0041 | conserved hypothetical protein                 | 40069  | 40320  | 251       | None/None                                                                                                                        | 0.11       |          |             |           |
|                 | JGS4143-0042 | protein of unknown function                    | 40363  | 40851  | 488       | None/None                                                                                                                        | 0.29       |          |             |           |
| VR-99           | JGS4143-0139 | sensor histidine kinase                        | 141936 | 142139 | 203       | None/None                                                                                                                        | 0.85       |          |             |           |
|                 | JGS4143-0141 | hypothetical protein                           | 143036 | 143221 | 185       | None/None                                                                                                                        | 0.86       |          |             |           |
| VR-100          | JGS4143-0157 | conserved hypothetical protein                 | 159764 | 161580 | 1816      | None/None                                                                                                                        | 0.29       |          |             |           |
|                 | JGS4143-0158 | hypothetical protein                           | 161971 | 162726 | 755       | None/None                                                                                                                        | 0.61       |          |             |           |
|                 | JGS4143-0159 | conserved hypothetical protein                 | 162760 | 162921 | 161       | None/None                                                                                                                        | 0.76       |          |             |           |
|                 | JGS4143-0160 | BR0 family, N- domain protein                  | 163032 | 163607 | 575       | None/None                                                                                                                        | 0.58       |          |             |           |
|                 | JGS4143-0163 | 2-keto-3-deoxygluconate kinase                 | 165851 | 166876 | 1025      | Carbohydrates/D-Galacturonate and D-Glucuronate Utilization                                                                      | 0.56       |          |             |           |
|                 | JGS4143-0164 | beta-glucuronidase (GUS)                       | 166939 | 168738 | 1799      | Carbohydrates/D-Galacturonate and D-Glucuronate Utilization                                                                      | 0.89       |          |             |           |
|                 | JGS4143-0165 | probable transcriptional regulator             | 168881 | 169570 | 689       | None/None                                                                                                                        | 0.74       |          |             |           |
|                 | JGS4143-0167 | khg/kdpg aldolase                              | 170626 | 171234 | 608       | Carbohydrates/D-Galacturonate and D-Glucuronate Utilization                                                                      | 0.64       |          |             |           |
|                 | JGS4143-0168 | mannonate dehydratase                          | 171325 | 172377 | 1052      | Carbohydrates/D-Galacturonate and D-Glucuronate Utilization                                                                      | 0.59       |          |             |           |
|                 | JGS4143-0169 | glucuronate isomerase                          | 172406 | 173806 | 1400      | Carbohydrates/D-Galacturonate and D-Glucuronate Utilization                                                                      | 0.55       |          |             |           |
|                 | JGS4143-0170 | glucuronide permease                           | 173927 | 175318 | 1391      | Miscellaneous/COG3533                                                                                                            | 0.61       |          |             |           |
|                 | JGS4143-0171 | beta-N-acetylglucosaminidase/beta-glucosidase  | 175382 | 177151 | 1769      | Carbohydrates/N-Acetyl-Galactosamine and Galactosamine Utilization<br>Carbohydrates/Chitin and N-acetylglucosamine utilization   | 0.58       |          |             |           |
| VR-101          | JGS4143-0278 | conserved hypothetical protein                 | 302596 | 304461 | 1865      | None/None                                                                                                                        | 0.45       |          |             |           |
|                 | JGS4143-0280 | conserved hypothetical protein                 | 306563 | 307366 | 803       | None/None                                                                                                                        | 0.56       |          |             |           |
|                 | JGS4143-0281 | conserved hypothetical protein                 | 307356 | 308023 | 667       | None/None                                                                                                                        | 0.86       |          |             |           |
| VR-102          | JGS4143-0283 | conserved hypothetical protein                 | 309213 | 309353 | 140       | None/None                                                                                                                        | 0.27       |          |             |           |
|                 | JGS4143-0284 | conserved domain protein                       | 309387 | 309596 | 209       | None/None                                                                                                                        | 0.32       |          |             |           |
| VR-103          | JGS4143-0370 | conserved hypothetical protein                 | 401266 | 401637 | 371       | None/None                                                                                                                        | 0.71       |          |             |           |
| VR-104          | JGS4143-0394 | hypothetical protein                           | 434926 | 435051 | 125       | None/None                                                                                                                        | 0.86       |          |             |           |
|                 | JGS4143-0395 | prophage dna primase                           | 435239 | 435460 | 221       | None/None                                                                                                                        | 0.12       |          |             |           |
|                 | JGS4143-0396 | hypothetical protein                           | 435910 | 436029 | 119       | None/None                                                                                                                        | 0.11       |          |             |           |
|                 | JGS4143-0397 | hypothetical protein                           | 436711 | 436899 | 188       | None/None                                                                                                                        | 0.36       |          |             |           |
|                 | JGS4143-0398 | modification methylase EcoRI                   | 437422 | 438450 | 1028      | None/None                                                                                                                        | 0.25       |          |             |           |
|                 | JGS4143-0400 | hypothetical protein                           | 439565 | 440437 | 872       | None/None                                                                                                                        | 0.29       |          |             |           |
|                 | JGS4143-0401 | hypothetical protein                           | 440430 | 440930 | 500       | None/None                                                                                                                        | 0.11       |          |             |           |
|                 | JGS4143-0403 | hypothetical protein                           | 441700 | 441855 | 155       | None/None                                                                                                                        | 0.20       |          |             |           |
| VR-105          | JGS4143-0472 | conserved hypothetical protein                 | 517607 | 520567 | 2960      | None/None                                                                                                                        | 0.74       | Yes      |             |           |
|                 | JGS4143-0473 | conserved hypothetical protein                 | 520882 | 521835 | 953       | None/None                                                                                                                        | 0.62       |          |             |           |
|                 | JGS4143-0474 | hypothetical protein                           | 521875 | 522023 | 148       | None/None                                                                                                                        | 0.78       |          |             |           |
|                 | JGS4143-0475 | hypothetical protein                           | 522170 | 523216 | 1046      | None/None                                                                                                                        | 0.50       |          |             |           |
|                 | JGS4143-0476 | helix-turn-helix domain protein                | 523289 | 523978 | 689       | None/None                                                                                                                        | 0.26       |          |             |           |
|                 | JGS4143-0477 | conserved hypothetical protein                 | 524123 | 524425 | 302       | None/None                                                                                                                        | 0.30       |          |             |           |
|                 | JGS4143-0478 | hypothetical protein                           | 524443 | 525132 | 689       | None/None                                                                                                                        | 0.67       |          |             |           |
|                 | JGS4143-0480 | conserved domain protein                       | 525467 | 525676 | 209       | None/None                                                                                                                        | 0.58       | Yes      |             |           |
| VR-106          | JGS4143-0483 | conserved hypothetical protein                 | 527109 | 527327 | 218       | None/None                                                                                                                        | 0.65       |          |             |           |
| VR-107          | JGS4143-0498 | transposon, resolvase                          | 540967 | 541467 | 500       | None/None                                                                                                                        | 0.72       | Yes      |             |           |
|                 | JGS4143-0499 | transposase                                    | 541568 | 541759 | 191       | None/None                                                                                                                        | 0.82       | Yes      |             |           |
|                 | JGS4143-0500 | hypothetical protein                           | 541898 | 542266 | 368       | None/None                                                                                                                        | 0.39       |          |             |           |
|                 | JGS4143-0501 | transposase, <i>OrfB</i> family                | 542319 | 542684 | 365       | None/None                                                                                                                        | 0.76       | Yes      |             |           |
| VR-108          | JGS4143-0507 | 4Fe-4S ferredoxin iron-sulfur binding domain   | 547750 | 548571 | 821       | Nitrogen Metabolism/Nitrate and nitrite ammonification                                                                           | 0.29       |          |             |           |
| VR-109          | JGS4143-0520 | conserved hypothetical protein                 | 561553 | 561708 | 155       | None/None                                                                                                                        | 0.84       |          |             |           |
|                 | JGS4143-0524 | capsular polysaccharide biosynthesis protein   | 564062 | 565378 | 1316      | Protein Metabolism/N-linked Glycosylation in Bacteria                                                                            | 0.58       |          |             |           |
|                 | JGS4143-0525 | sugar transferases involved in                 | 566164 | 566595 | 431       | None/None                                                                                                                        | 0.36       |          |             |           |
|                 | JGS4143-0526 | dtidp-4 dehydroharnose 3,5-epimerase, putative | 566621 | 567523 | 902       | None/None                                                                                                                        | 0.61       |          |             |           |
|                 | JGS4143-0527 | capsular polysaccharide biosynthesis protein   | 567524 | 568714 | 1190      | None/None                                                                                                                        | 0.40       |          |             |           |
|                 | JGS4143-0528 | polysaccharide biosynthesis protein CapD       | 568734 | 569780 | 1046      | Protein Metabolism/N-linked Glycosylation in Bacteria                                                                            | 0.15       |          |             |           |
|                 | JGS4143-0529 | NAD-dependent epimerase/dehydratase            | 569795 | 570919 | 1124      | None/None                                                                                                                        | 0.32       |          |             |           |
|                 | JGS4143-0530 | UDP-N-acetylglucosamine 2-epimerase            | 570906 | 572030 | 1124      | Cell Wall and Capsule/Sialic Acid Metabolism                                                                                     | 0.18       |          |             |           |
|                 | JGS4143-0531 | putative glycosyl transferase                  | 572032 | 573219 | 1187      | Cofactors, Vitamins, Prosthetic Groups, Pigments/Biotin biosynthesis                                                             | 0.20       |          |             |           |
|                 | JGS4143-0532 | putative transferase                           | 573219 | 574334 | 1115      | None/None                                                                                                                        | 0.15       |          |             |           |
|                 | JGS4143-0534 | glycosyl transferase, group 2 family protein   | 575461 | 576276 | 815       | None/None                                                                                                                        | 0.61       |          |             |           |
|                 | JGS4143-0535 | flippase Wzx                                   | 576293 | 577738 | 1445      | None/None                                                                                                                        | 0.20       |          |             |           |
| VR-110          | JGS4143-0536 | udp-glucose 6-dehydrogenase (udp-glc)          | 577919 | 579085 | 1166      | Cell Wall and Capsule/Streptococcal Hyaluronic Acid Capsule                                                                      | 0.42       |          |             |           |
|                 | JGS4143-0537 | transcriptional regulator, <i>LytR</i> family  | 579160 | 579780 | 620       | Regulation and Cell signaling/Cell envelope-associated <i>LytR</i> - <i>CpsA</i> - <i>Psr</i> transcriptional attenuators        | 0.64       |          |             |           |
| VR-111          | JGS4143-0546 | transcriptional regulator, <i>AraC</i> family  | 588172 | 589026 | 854       | Carbohydrates/Fructooligosaccharides(FOS) and Raffinose Utilization                                                              | 0.45       |          |             |           |
| VR-113          | JGS4143-0593 | conserved hypothetical protein                 | 636367 | 637008 | 641       | None/None                                                                                                                        | 0.63       |          |             |           |
| VR-114          | JGS4143-0613 | cell wall binding repeat domain protein        | 659365 | 660237 | 872       | Stress Response/Choline and Betaine Uptake and Betaine Biosynthesis                                                              | 0.58       |          |             |           |
| VR-115          | JGS4143-0727 | conserved hypothetical protein                 | 789160 | 789339 | 179       | None/None                                                                                                                        | 0.55       |          |             |           |
|                 | JGS4143-0728 | voltage-gated chloride channel family protein  | 789381 | 790154 | 773       | None/None                                                                                                                        | 0.50       |          |             |           |
|                 | JGS4143-0729 | voltage-gated chloride channel family protein  | 790196 | 790636 | 440       | None/None                                                                                                                        | 0.71       |          |             |           |
| VR-116          | JGS4143-0804 | conserved hypothetical protein                 | 874496 | 874915 | 419       | None/None                                                                                                                        | 0.64       |          |             |           |
| VR-117          | JGS4143-0810 | hypothetical protein                           | 881055 | 881792 | 737       | None/None                                                                                                                        | 0.61       |          |             |           |
| VR-118          | JGS4143-0827 | conserved hypothetical protein                 | 897179 | 898132 | 953       | None/None                                                                                                                        | 0.89       |          |             |           |
| VR-119          | JGS4143-0843 | hypothetical protein                           | 912475 | 912798 | 323       | None/None                                                                                                                        | 0.64       |          |             |           |
| VR-120          | JGS4143-0907 | <i>YhbE</i>                                    | 970000 | 970716 | 716       | None/None                                                                                                                        | 0.71       |          |             |           |
|                 | JGS4143-0908 | <i>YhbF</i>                                    | 970768 | 971511 | 743       | None/None                                                                                                                        | 0.66       |          |             |           |
|                 | JGS4143-0909 | <i>YhbD</i>                                    | 971496 | 972125 | 629       | None/None                                                                                                                        | 0.76       |          |             |           |
| VR-121          | JGS4143-0922 | phage protein                                  | 982919 | 984214 | 1295      | None/None                                                                                                                        | 0.58       |          |             |           |
|                 | JGS4143-0925 | hypothetical protein                           | 986785 | 986964 | 179       | None/None                                                                                                                        | 0.81       |          |             |           |
|                 | JGS4143-0926 | VanZ like family                               | 986992 | 987558 | 566       | None/None                                                                                                                        | 0.83       |          |             |           |

Table S3. Variable genes identified among 63 poultry and non-poultry isolates.

| Variable Region | Locus_tag      | Product                                        | Start   | Stop    | Size (bp) | Functional Category/Subcategory                                                   | Prevalence | phage/IS | Plasmid Hit | pNet8 Hit |
|-----------------|----------------|------------------------------------------------|---------|---------|-----------|-----------------------------------------------------------------------------------|------------|----------|-------------|-----------|
|                 | JGS4143-0927   | hypothetical protein                           | 987562  | 987987  | 425       | None/None                                                                         | 0.59       |          |             |           |
|                 | JGS4143-0928   | hypothetical protein                           | 988221  | 988466  | 245       | None/None                                                                         | 0.72       |          |             |           |
|                 | JGS4143-0929   | hypothetical protein                           | 988721  | 988858  | 137       | None/None                                                                         | 0.54       |          |             |           |
|                 | JGS4143-0930   | Fun2 family protein                            | 989070  | 989593  | 623       | None/None                                                                         | 0.81       |          |             |           |
|                 | JGS4143-0931   | FunZ family protein                            | 989699  | 990628  | 929       | None/None                                                                         | 0.73       |          |             |           |
| VR-122          | JGS4143-0934   | two-component sensor kinase YesM, putative     | 993040  | 995730  | 1790      | None/None                                                                         | 0.32       |          |             |           |
|                 | JGS4143-0936   | ABC-type sugar transport system, periplasmic   | 997410  | 998678  | 1268      | Carbohydrates/Chitin and N-acetylglucosamine utilization<br>Miscellaneous/COG3533 | 0.73       |          |             |           |
|                 | JGS4143-0937   | ABC transporter, permease protein              | 998768  | 999673  | 905       | Carbohydrates/Chitin and N-acetylglucosamine utilization                          | 0.35       |          |             |           |
|                 | JGS4143-0938   | ABC transporter, permease protein              | 999689  | 1000564 | 875       | Carbohydrates/Chitin and N-acetylglucosamine utilization                          | 0.44       |          |             |           |
|                 | JGS4143-0939   | glycosyl hydrolase, family 31                  | 1000592 | 1002133 | 1541      | Carbohydrates/Maltose and Maltodextrin Utilization                                | 0.82       |          |             |           |
|                 | JGS4143-0940   | alpha-N-acetylglucosaminidase family protein   | 1002157 | 1004256 | 2099      | None/None                                                                         | 0.53       |          |             |           |
| VR-123          | JGS4143-0949   | glycosyl hydrolase, family 20, putative        | 1009130 | 1010149 | 1019      | None/None                                                                         | 0.24       |          |             |           |
|                 | JGS4143-0950   | glycosyl hydrolase, family 20                  | 1010227 | 1013115 | 2888      | None/None                                                                         | 0.52       |          |             |           |
| VR-124          | JGS4143-0969   | two-component sensor histidine kinase          | 1040291 | 1040991 | 680       | None/None                                                                         | 0.89       |          |             |           |
| VR-125          | JGS4143-1023   | phosphorylase family protein                   | 1089237 | 1090022 | 785       | None/None                                                                         | 0.88       |          |             |           |
| VR-126          | JGS4143-1062   | RNA polymerase sigma-70 factor                 | 1120388 | 1120930 | 542       | RNA Metabolism/Transcription initiation, bacterial sigma factors                  | 0.77       |          |             |           |
|                 | JGS4143-1063   | hypothetical protein                           | 1120932 | 1122263 | 1331      | None/None                                                                         | 0.89       |          |             |           |
| VR-127          | JGS4143-1246   | HNH endonuclease domain protein                | 1276572 | 1276892 | 320       | None/None                                                                         | 0.65       | Yes      |             |           |
|                 | JGS4143-1247   | phage Terminase Small Subunit                  | 1277161 | 1277382 | 221       | None/None                                                                         | 0.71       |          |             |           |
|                 | JGS4143-1248   | putative phage terminase, large subunit        | 1277375 | 1279042 | 1667      | None/None                                                                         | 0.81       | Yes      |             |           |
|                 | JGS4143-1249   | hypothetical protein                           | 1279119 | 1279247 | 128       | None/None                                                                         | 0.62       |          |             |           |
|                 | JGS4143-1250   | conserved hypothetical protein                 | 1279247 | 1279675 | 428       | None/None                                                                         | 0.70       | Yes      |             |           |
|                 | JGS4143-1251   | portal protein                                 | 1279659 | 1280477 | 818       | None/None                                                                         | 0.48       | Yes      |             |           |
|                 | JGS4143-1252   | phage prohead protease, HK97 family            | 1280578 | 1281054 | 476       | None/None                                                                         | 0.69       | Yes      |             |           |
|                 | JGS4143-1253   | phage major capsid protein, HK97 family        | 1281104 | 1282207 | 1103      | Phages, Prophages, Transposable elements, Plasmids/Phage capsid proteins          | 0.52       | Yes      |             |           |
|                 | JGS4143-1254   | conserved hypothetical protein                 | 1282260 | 1282550 | 290       | None/None                                                                         | 0.65       |          |             |           |
|                 | JGS4143-1255   | phage head tail adaptor, putative              | 1282543 | 1283878 | 1335      | None/None                                                                         | 0.44       | Yes      |             |           |
|                 | JGS4143-1256   | phage protein, HK97 gp10 family                | 1282879 | 1283238 | 359       | None/None                                                                         | 0.82       |          |             |           |
|                 | JGS4143-1257   | conserved hypothetical protein                 | 1283241 | 1283600 | 359       | None/None                                                                         | 0.75       |          |             |           |
|                 | JGS4143-1258   | phage major tail protein, Phi13 family         | 1283621 | 1284238 | 617       | None/None                                                                         | 0.12       |          |             |           |
|                 | JGS4143-1259   | conserved hypothetical protein                 | 1284260 | 1284601 | 341       | None/None                                                                         | 0.80       |          |             |           |
|                 | JGS4143-1260   | phage tail tape measure protein, family, core  | 1285225 | 1285473 | 248       | None/None                                                                         | 0.71       |          |             |           |
| VR-128          | JGS4143-1337   | nucleotidyltransferase family protein          | 1343563 | 1343844 | 281       | None/None                                                                         | 0.72       |          |             |           |
| VR-129          | JGS4143-1380   | hypothetical protein                           | 1374445 | 1375617 | 1172      | None/None                                                                         | 0.77       |          |             |           |
| VR-130          | JGS4143-1385   | endo-alpha-N-acetylgalactosaminidase           | 1381009 | 1381161 | 152       | None/None                                                                         | 0.87       |          |             |           |
| VR-131          | JGS4143-1408   | hypothetical protein                           | 1401591 | 1401797 | 206       | None/None                                                                         | 0.59       |          |             |           |
| VR-132          | JGS4143-1441   | putative alpha-N-acetylgalactosaminidase       | 1436799 | 1438238 | 1439      | None/None                                                                         | 0.59       |          |             |           |
| VR-133          | JGS4143-1447   | hypothetical protein                           | 1441281 | 1441811 | 530       | None/None                                                                         | 0.17       |          |             |           |
|                 | JGS4143-1448   | type III restriction enzyme, res subunit       | 1441804 | 1444026 | 2222      | None/None                                                                         | 0.58       |          |             |           |
|                 | JGS4143-1449   | conserved hypothetical protein                 | 1444185 | 1444406 | 221       | None/None                                                                         | 0.25       |          |             |           |
|                 | JGS4143-1450   | RNA polymerase sigma factor, sigma-70 family   | 1444809 | 1445402 | 593       | None/None                                                                         | 0.40       |          |             |           |
|                 | JGS4143-1451   | nucleoside triphosphatase, D5 family, putative | 1445807 | 1448710 | 2903      | None/None                                                                         | 0.30       |          |             |           |
|                 | JGS4143-1452   | DNA-directed DNA polymerase                    | 1448836 | 1450764 | 1928      | DNA Metabolism/DNA Repair Base Excision<br>DNA Metabolism/DNA-replication         | 0.26       | Yes      |             |           |
|                 | JGS4143-1453   | DNA-binding protein                            | 1451590 | 1452129 | 539       | None/None                                                                         | 0.14       |          |             |           |
|                 | JGS4143-1454   | conserved hypothetical protein                 | 1452369 | 1452725 | 356       | None/None                                                                         | 0.15       |          |             |           |
|                 | JGS4143-1455   | conserved hypothetical protein                 | 1452930 | 1453418 | 488       | None/None                                                                         | 0.76       |          |             |           |
| VR-134          | JGS4143-1456   | F5/8 type C domain containing protein          | 1453508 | 1456894 | 3386      | None/None                                                                         | 0.60       |          |             |           |
| VR-135          | JGS4143-1460   | Flh family protein                             | 1463424 | 1464611 | 1187      | None/None                                                                         | 0.43       |          |             |           |
| VR-136          | JGS4143-1482   | NADH oxidase                                   | 1489168 | 1491090 | 1922      | None/None                                                                         | 0.86       |          |             |           |
|                 | JGS4143-1483   | hydrolases of the alpha/beta superfamily       | 1491106 | 1491867 | 761       | None/None                                                                         | 0.38       |          |             |           |
| VR-137          | JGS4143-1484   | C4-dicarboxylate transport system              | 1492061 | 1493368 | 1307      | Membrane Transport/TRAP Transporter collection                                    | 0.53       |          |             |           |
|                 | JGS4143-1486   | C4-dicarboxylate transport system              | 1493929 | 1494936 | 1007      | Membrane Transport/TRAP Transporter collection                                    | 0.81       |          |             |           |
| VR-138          | JGS4143-1847   | hypothetical protein                           | 1832445 | 1833809 | 1364      | None/None                                                                         | 0.64       |          |             |           |
| VR-139          | JGS4143-2057   | hypothetical protein                           | 2025433 | 2025549 | 116       | None/None                                                                         | 0.85       |          |             |           |
| VR-140          | JGS4143-2323   | ABC transporter, ATP-binding protein           | 2283841 | 2284533 | 692       | None/None                                                                         | 0.89       |          |             |           |
| VR-141          | JGS4143-2973   | transporter, monovalent cation:proton          | 2955883 | 2957316 | 1433      | None/None                                                                         | 0.59       |          |             |           |
| VR-142          | pBCNF5603_uvIA | UvIA protein                                   |         |         | 0         | None/None                                                                         | 0.85       |          |             |           |
|                 | pBCNF5603_uvIB | UvIB protein                                   |         |         | 0         | None/None                                                                         | 0.88       |          |             |           |
|                 | pCPF4969_51    | putative SpaC protein                          |         |         | 0         | None/None                                                                         | 0.78       |          |             |           |
|                 | pCPF5603_10    | collagen adhesion protein                      |         |         | 0         | None/None                                                                         | 0.76       |          |             |           |
|                 | pCPF5603_68    | putative TrnI16 ORF15 protein                  |         |         | 0         | None/None                                                                         | 0.63       |          |             |           |
|                 | pCPF5603_70    | putative TrnI16 ORF16 protein                  |         |         | 0         | None/None                                                                         | 0.79       |          |             |           |



**Table S4. Prevalence of chromosomally-encoded toxins and extracellular enzymes among 54 poultry isolates.**

| <b>Toxin</b>               | <b>Gene</b>   | <b>Reference locus_tag</b> | <b>CP4 locus_tag</b> | <b>Prevalence</b> |
|----------------------------|---------------|----------------------------|----------------------|-------------------|
| Perfringolysin             | <i>pfoA</i>   | CPF_0156                   | CP4_0202             | 0.98              |
| Sialidase/neuramindase     | <i>nanJ</i>   | CPF_0523                   | CP4_0614             | 0.98              |
| Sialidase/neuramindase     | <i>nanI</i>   | CPF_0721                   | CP4_0806             | 0.98              |
| Sialidase/neuramindase     | <i>nanH</i>   | CPF_0985                   | CP4_1082             | 0.98              |
| Enterotoxin                | <i>EntC</i>   | CPF_0454                   | absent               | n/a <sup>1</sup>  |
| Enterotoxin                | <i>EntD</i>   | CPF_0587                   | CP4_0668-9           | 0.98              |
| Enterotoxin                | <i>EntD</i>   | CPF_1439                   | CP4_1569-70          | 1.00              |
| Enterotoxin                | <i>EntA</i>   | CPF_1467                   | CP4_1606             | 1.00              |
| Collagenases (kappa-toxin) | <i>colA</i>   | CPF_0166                   | CP4_0211-2           | 1.00              |
| Hyaluronidase (mu-toxin)   | <i>nagH</i>   | CPF_0184                   | CP4_0231             | 1.00              |
| Hyaluronidase (mu-toxin)   | <i>nagE</i>   | CPF_0071                   | CP4_0122             | 1.00              |
| Hyaluronidase (mu-toxin)   | <i>nagJ</i>   | CPF_1442                   | CP4_1581             | 1.00              |
| Hyaluronidase (mu-toxin)   | <i>nagA</i>   | CPF_2434                   | CP4_2582             | 1.00              |
| Hyaluronidase (mu-toxin)   | <i>nagL</i>   | CPE_1523                   | CP4_1876             | 0.82              |
| a-clostripain              |               | CPF_0840                   | CP4_0923             | 1.00              |
| hemolysin III              |               | CPF_1725                   | CP4_1826             | 0.98              |
| Hemolysin A                |               | CPF_2072                   | CP4_2174             | 1.00              |
| hemolysin III              | <i>hlyIII</i> | CPF_2171                   | CP4_2271             | 1.00              |

n/a, not applicable.

**Table S5. PCR confirmation of CGH results.** The specificity and sensitivity of the array probes for 10 genes are shown based on PCR confirmation in 30 poultry isolates.

| Locus_tag    | True positives | True negatives | False positives | False negatives | Specificity | Sensitivity |
|--------------|----------------|----------------|-----------------|-----------------|-------------|-------------|
| CP4_0445     | 24             | 5              | 0               | 0               | 1.00        | 1.00        |
| CP4_0448     | 24             | 5              | 0               | 0               | 1.00        | 1.00        |
| CP4_0463     | 22             | 8              | 0               | 0               | 1.00        | 1.00        |
| CP4_0468     | 22             | 8              | 0               | 0               | 1.00        | 1.00        |
| CP4_0783     | 20             | 7              | 1               | 0               | 0.88        | 1.00        |
| CP4_1608     | 20             | 9              | 0               | 0               | 1.00        | 1.00        |
| CP4_2645     | 19             | 9              | 0               | 0               | 1.00        | 1.00        |
| JGS4143-0169 | 12             | 16             | 1               | 0               | 0.94        | 1.00        |
| JGS4143-0500 | 8              | 18             | 3               | 0               | 0.86        | 1.00        |
| CP4_2821     | 30             | 0              | 0               | 0               | 1.00        | 1.00        |



**Table S6. Fisher's exact tests performed on variable genes.** Q-values represent p-values corrected for multiple-testing. Only q-values < 0.05 are shown.

| Variable Region | Locus_tag         | Product                                                                                                                     | <i>netB</i> + | <i>netB</i> + | <i>netB</i> + | <i>netB</i> - | <i>netB</i> - | <i>netB</i> - | <i>netB</i> + vs <i>netB</i> -<br>q-value | Non-poultry | Non-poultry | Non-poultry | Poultry | Poultry | Poultry    | Poultry vs Non-poultry |          |
|-----------------|-------------------|-----------------------------------------------------------------------------------------------------------------------------|---------------|---------------|---------------|---------------|---------------|---------------|-------------------------------------------|-------------|-------------|-------------|---------|---------|------------|------------------------|----------|
|                 |                   |                                                                                                                             | Absent        | Present       | Prevalence    | Absent        | Present       | Prevalence    |                                           | Absent      | Present     | prevalence  | Absent  | Present | prevalence | q-value                |          |
| VR-14           | CP4_0688          | cell wall binding repeat-containing protein/mannosyl glycoprotein endo-beta-N-acetylglucosamidase domain-containing protein | 4             | 17            | 0.81          | 11            | 22            | 0.67          |                                           |             | 5           | 4           | 0.44    | 14      | 40         | 0.74                   | 4.43E-02 |
|                 | CP4_0689          | cell wall binding repeat-containing protein/zinc carboxypeptidase family protein                                            | 6             | 15            | 0.71          | 9             | 24            | 0.73          |                                           |             |             |             |         |         |            |                        |          |
|                 | CP4_0690          | cell wall binding repeat-containing protein                                                                                 | 5             | 16            | 0.76          | 14            | 19            | 0.58          |                                           |             |             |             |         |         |            |                        |          |
| VR-15           | CP4_0691          | cell wall binding repeat-containing protein                                                                                 | 1             | 20            | 0.95          | 5             | 27            | 0.84          |                                           |             |             |             |         |         |            |                        |          |
| VR-16           | CP4_0783          | oxidoreductase, FAD/FMN-binding                                                                                             | 3             | 18            | 0.86          | 15            | 17            | 0.53          | 2.12E-02                                  | 6           | 3           | 0.33        | 18      | 35      | 0.66       | 3.47E-02               |          |
| VR-17           | CP4_0797          | RNA polymerase ECF-type sigma factor                                                                                        | 1             | 20            | 0.95          | 5             | 24            | 0.83          |                                           |             |             |             |         |         |            |                        |          |
| VR-18           | CP4_0831          | conserved hypothetical protein                                                                                              | 4             | 17            | 0.81          | 6             | 27            | 0.82          |                                           | 8           | 1           | 0.11        | 10      | 44      | 0.81       | 5.42E-05               |          |
|                 | CP4_0833          | hypothetical protein                                                                                                        | 1             | 20            | 0.95          | 1             | 31            | 0.97          |                                           | 5           | 4           | 0.44        | 2       | 51      | 0.96       | 3.06E-04               |          |
| VR-19           | CP4_0841          | conserved hypothetical protein                                                                                              | 7             | 14            | 0.67          | 20            | 13            | 0.39          |                                           | 8           | 1           | 0.11        | 27      | 27      | 0.50       | 1.55E-02               |          |
| VR-20           | CP4_0850          | conserved hypothetical protein                                                                                              | 0             | 20            | 1.00          | 1             | 28            | 0.97          |                                           | 6           | 3           | 0.33        | 1       | 48      | 0.98       | 8.30E-06               |          |
| VR-21           | CP4_0859          | rubredoxin                                                                                                                  | 0             | 21            | 1.00          | 6             | 27            | 0.82          |                                           |             |             |             |         |         |            |                        |          |
| VR-22           | CP4_0874          | probable iron(III) dicitrate ABC transporter                                                                                | 0             | 21            | 1.00          | 11            | 22            | 0.67          | 4.30E-03                                  |             |             |             |         |         |            |                        |          |
|                 | CP4_0875          | iron compound ABC transporter, permease protein                                                                             | 0             | 21            | 1.00          | 12            | 21            | 0.64          | 2.17E-03                                  |             |             |             |         |         |            |                        |          |
|                 | CP4_0876          | ABC transport system permease protein                                                                                       | 0             | 21            | 1.00          | 8             | 25            | 0.76          | 2.00E-02                                  |             |             |             |         |         |            |                        |          |
|                 | CP4_0877          | ferrichrome transport ATP-binding protein FhuC                                                                              | 0             | 21            | 1.00          | 10            | 23            | 0.70          | 5.25E-03                                  |             |             |             |         |         |            |                        |          |
| VR-23           | CP4_0896          | conserved hypothetical protein                                                                                              | 4             | 17            | 0.81          | 3             | 30            | 0.91          |                                           |             |             |             |         |         |            |                        |          |
| VR-24           | CP4_0919          | sensory transduction protein BceR                                                                                           | 2             | 17            | 0.89          | 4             | 22            | 0.85          |                                           |             |             |             |         |         |            |                        |          |
|                 | CP4_0924          | bacitracin export ATP-binding protein BceA                                                                                  | 2             | 14            | 0.88          | 2             | 21            | 0.91          |                                           |             |             |             |         |         |            |                        |          |
|                 | CP4_0927          | stress responsive alpha-beta barrel domain-containing protein                                                               | 3             | 18            | 0.86          | 6             | 27            | 0.82          |                                           |             |             |             |         |         |            |                        |          |
|                 | CP4_0929          | conserved hypothetical protein                                                                                              | 1             | 14            | 0.93          | 3             | 21            | 0.88          |                                           | 3           | 6           | 0.67        | 4       | 36      | 0.90       | 4.25E-02               |          |
| VR-25           | CP4_0947          | conserved hypothetical protein                                                                                              | 3             | 17            | 0.85          | 4             | 24            | 0.86          |                                           |             |             |             |         |         |            |                        |          |
|                 | CP4_0950          | conserved hypothetical protein                                                                                              | 0             | 18            | 1.00          | 5             | 20            | 0.80          |                                           |             |             |             |         |         |            |                        |          |
| VR-26           | CP4_0963          | resolvase domain-containing protein                                                                                         | 0             | 21            | 1.00          | 6             | 26            | 0.81          |                                           |             |             |             |         |         |            |                        |          |
| VR-27           | CP4_1008          | conserved hypothetical protein                                                                                              | 0             | 20            | 1.00          | 7             | 23            | 0.77          | 3.64E-02                                  | 4           | 5           | 0.56        | 7       | 43      | 0.86       | 2.07E-02               |          |
|                 | CP4_1010          | putative toxin-antitoxin system, toxin component                                                                            | 2             | 19            | 0.90          | 16            | 16            | 0.50          | 3.71E-03                                  | 8           | 1           | 0.11        | 18      | 35      | 0.66       | 1.59E-03               |          |
| VR-28           | CP4_1036          | putative phage terminase, large subunit                                                                                     | 6             | 15            | 0.71          | 9             | 24            | 0.73          |                                           | 8           | 1           | 0.11        | 15      | 39      | 0.72       | 7.21E-04               |          |
| VR-29           | CP4_1061          | DNA adenine-specific methyltransferase                                                                                      | 7             | 7             | 0.50          | 14            | 6             | 0.30          |                                           |             |             |             |         |         |            |                        |          |
| VR-30           | CP4_1069          | probable autolytic lysozyme                                                                                                 | 1             | 20            | 0.95          | 9             | 24            | 0.73          |                                           | 6           | 3           | 0.33        | 10      | 44      | 0.81       | 3.58E-03               |          |
|                 | CP4_1071          | conserved hypothetical protein                                                                                              | 4             | 17            | 0.81          | 5             | 28            | 0.85          |                                           | 9           | 0           | 0.00        | 9       | 45      | 0.83       | 3.55E-06               |          |
|                 | CP4_1076          | phosphorylase family protein                                                                                                | 0             | 21            | 1.00          | 4             | 29            | 0.88          |                                           | 5           | 4           | 0.44        | 4       | 50      | 0.93       | 1.00E-03               |          |
| VR-31           | CP4_1098          | caax amino protease family protein                                                                                          | 1             | 20            | 0.95          | 3             | 30            | 0.91          |                                           | 3           | 6           | 0.67        | 4       | 50      | 0.93       | 2.23E-02               |          |
|                 | CP4_1099          | ProFAR isomerase associated superfamily                                                                                     | 1             | 20            | 0.95          | 3             | 26            | 0.90          |                                           | 4           | 5           | 0.56        | 4       | 46      | 0.92       | 6.76E-03               |          |
|                 | CP4_1100          | conserved hypothetical protein                                                                                              | 1             | 20            | 0.95          | 1             | 32            | 0.97          |                                           | 6           | 3           | 0.33        | 2       | 52      | 0.96       | 2.17E-05               |          |
| VR-32           | CP4_1106          | conserved hypothetical protein                                                                                              | 2             | 19            | 0.90          | 6             | 27            | 0.82          |                                           | 4           | 5           | 0.56        | 8       | 46      | 0.85       | 2.43E-02               |          |
|                 | CP4_1107          | methionyl-tRNA formyltransferase                                                                                            | 0             | 21            | 1.00          | 4             | 29            | 0.88          |                                           | 4           | 5           | 0.56        | 4       | 50      | 0.93       | 5.96E-03               |          |
|                 | CP4_1110          | transcriptional regulator                                                                                                   | 0             | 21            | 1.00          | 1             | 28            | 0.97          |                                           | 5           | 4           | 0.44        | 1       | 49      | 0.98       | 1.34E-04               |          |
|                 | CP4_1114          | conserved hypothetical protein                                                                                              | 0             | 21            | 1.00          | 1             | 32            | 0.97          |                                           | 7           | 2           | 0.22        | 1       | 53      | 0.98       | 3.55E-06               |          |
| VR-33           | CP4_1130          | putative toxin-antitoxin system, toxin component                                                                            | 3             | 14            | 0.82          | 2             | 21            | 0.91          |                                           | 4           | 5           | 0.56        | 5       | 36      | 0.88       | 1.77E-02               |          |
|                 | CP4_1131          | toxin-antitoxin system, antitoxin component, Xre family                                                                     | 0             | 21            | 1.00          | 7             | 23            | 0.77          | 3.64E-02                                  | 4           | 5           | 0.56        | 7       | 44      | 0.86       | 1.99E-02               |          |
|                 | CP4_1134          | conserved hypothetical protein                                                                                              | 2             | 19            | 0.90          | 4             | 28            | 0.88          |                                           |             |             |             |         |         |            |                        |          |
|                 | CP4_1135          | conserved hypothetical protein                                                                                              | 4             | 17            | 0.81          | 1             | 32            | 0.97          |                                           | 3           | 6           | 0.67        | 5       | 49      | 0.91       | 3.50E-02               |          |
|                 | CP4_1136          | acetyltransferase                                                                                                           | 6             | 15            | 0.71          | 3             | 30            | 0.91          |                                           |             |             |             |         |         |            |                        |          |
|                 | CP4_1137          | conserved hypothetical protein                                                                                              | 1             | 20            | 0.95          | 7             | 25            | 0.78          |                                           |             |             |             |         |         |            |                        |          |
| VR-34           | CP4_1150          | lipoprotein, putative                                                                                                       | 1             | 20            | 0.95          | 7             | 25            | 0.78          |                                           | 5           | 4           | 0.44        | 8       | 45      | 0.85       | 7.01E-03               |          |
|                 | CP4_1153          | conserved hypothetical protein                                                                                              | 4             | 17            | 0.81          | 0             | 33            | 1.00          | 2.19E-02                                  | 4           | 5           | 0.56        | 4       | 50      | 0.93       | 5.96E-03               |          |
|                 | CP4_1154          | conserved hypothetical protein                                                                                              | 0             | 20            | 1.00          | 6             | 22            | 0.79          | 3.65E-02                                  | 5           | 4           | 0.44        | 6       | 42      | 0.88       | 5.00E-03               |          |
|                 | CP4_1158          | conserved hypothetical protein                                                                                              | 1             | 20            | 0.95          | 10            | 18            | 0.64          | 1.92E-02                                  |             |             |             |         |         |            |                        |          |
|                 | CP4_1159          | conserved hypothetical protein                                                                                              | 4             | 17            | 0.81          | 1             | 32            | 0.97          |                                           |             |             |             |         |         |            |                        |          |
|                 | CP4_1165          | UBA/TS-N domain-containing protein                                                                                          | 0             | 21            | 1.00          | 6             | 27            | 0.82          |                                           | 3           | 6           | 0.67        | 6       | 48      | 0.89       | 4.43E-02               |          |
|                 | CP4_1167          | sensor histidine kinase                                                                                                     | 0             | 21            | 1.00          | 4             | 29            | 0.88          |                                           | 3           | 6           | 0.67        | 4       | 50      | 0.93       | 2.23E-02               |          |
| CP4_1169        | acetyltransferase | 1                                                                                                                           | 20            | 0.95          | 6             | 25            | 0.81          |               | 4                                         | 5           | 0.56        | 7           | 45      | 0.87    | 1.77E-02   |                        |          |

**Table S6. Fisher's exact tests performed on variable genes.** Q-values represent p-values corrected for multiple-testing. Only q-values < 0.05 are shown.

| Variable Region | Locus_tag | Product                                                             | netB + | netB +  | netB +     | netB - | netB -  | netB -     | netB + vs netB - | Non-poultry | Non-poultry | Non-poultry | Poultry | Poultry | Poultry    | Poultry vs Non-poultry |
|-----------------|-----------|---------------------------------------------------------------------|--------|---------|------------|--------|---------|------------|------------------|-------------|-------------|-------------|---------|---------|------------|------------------------|
|                 |           |                                                                     | Absent | Present | Prevalence | Absent | Present | Prevalence | q-value          | Absent      | Present     | prevalence  | Absent  | Present | prevalence | q-value                |
| VR-35           | CP4_1181  | discoidin domain-containing protein                                 | 8      | 12      | 0.60       | 18     | 12      | 0.40       |                  |             |             |             |         |         |            |                        |
|                 | CP4_1184  | [Fe] hydrogenase                                                    | 0      | 21      | 1.00       | 6      | 27      | 0.82       |                  |             |             |             |         |         |            |                        |
| VR-36           | CP4_1238  | collagen adhesion protein                                           | 0      | 21      | 1.00       | 1      | 32      | 0.97       |                  | 7           | 2           | 0.22        | 1       | 53      | 0.98       | 3.55E-06               |
| VR-37           | CP4_1251  | hydroxylamine reductase                                             | 0      | 21      | 1.00       | 15     | 17      | 0.53       | 1.28E-04         | 6           | 3           | 0.33        | 15      | 38      | 0.72       | 1.99E-02               |
| VR-38           | CP4_1323  | lipoprotein-releasing system ATP-binding protein LoID               | 0      | 21      | 1.00       | 4      | 25      | 0.86       |                  | 4           | 5           | 0.56        | 4       | 46      | 0.92       | 6.76E-03               |
|                 | CP4_1324  | conserved hypothetical protein                                      | 0      | 20      | 1.00       | 5      | 26      | 0.84       |                  | 4           | 5           | 0.56        | 5       | 46      | 0.90       | 9.61E-03               |
|                 | CP4_1325  | putative permease                                                   | 2      | 19      | 0.90       | 13     | 20      | 0.61       | 3.45E-02         |             |             |             |         |         |            |                        |
|                 | CP4_1329  | nudix family hydrolase                                              | 1      | 19      | 0.95       | 7      | 25      | 0.78       |                  |             |             |             |         |         |            |                        |
| VR-39           | CP4_1336  | histidine kinase KdpD                                               | 0      | 17      | 1.00       | 3      | 19      | 0.86       |                  |             |             |             |         |         |            |                        |
|                 | CP4_1342  | conserved hypothetical protein                                      | 2      | 13      | 0.87       | 3      | 18      | 0.86       |                  |             |             |             |         |         |            |                        |
| VR-40           | CP4_1388  | ggdef/eal domain-containing protein                                 | 1      | 19      | 0.95       | 4      | 23      | 0.85       |                  |             |             |             |         |         |            |                        |
| VR-41           | CP4_1461  | AP endonuclease                                                     | 1      | 18      | 0.95       | 1      | 27      | 0.96       |                  | 5           | 4           | 0.44        | 2       | 46      | 0.96       | 4.08E-04               |
| VR-42           | CP4_1477  | lipoprotein, putative                                               | 3      | 18      | 0.86       | 5      | 25      | 0.83       |                  |             |             |             |         |         |            |                        |
| VR-43           | CP4_1594  | chromosome segregation ATPase                                       | 4      | 9       | 0.69       | 5      | 8       | 0.62       |                  | 8           | 1           | 0.11        | 9       | 17      | 0.65       | 3.66E-03               |
| VR-44           | CP4_1608  | conserved hypothetical protein                                      | 1      | 20      | 0.95       | 15     | 18      | 0.55       | 2.23E-03         | 3           | 6           | 0.67        | 6       | 48      | 0.89       | 4.43E-02               |
| VR-45           | CP4_1619  | lysine-N-methylase                                                  | 3      | 17      | 0.85       | 4      | 23      | 0.85       |                  | 5           | 4           | 0.44        | 7       | 39      | 0.85       | 7.16E-03               |
| VR-46           | CP4_1641  | xanthine phosphoribosyltransferase                                  | 1      | 12      | 0.92       | 4      | 17      | 0.81       |                  |             |             |             |         |         |            |                        |
| VR-47           | CP4_1710  | conserved hypothetical protein                                      | 0      | 21      | 1.00       | 5      | 28      | 0.85       |                  |             |             |             |         |         |            |                        |
| VR-48           | CP4_1730  | transposon, resolvase                                               | 2      | 19      | 0.90       | 14     | 19      | 0.58       | 1.68E-02         |             |             |             |         |         |            |                        |
| VR-49           | CP4_1860  | BNR/Asp-box repeat-containing protein                               | 5      | 16      | 0.76       | 8      | 25      | 0.76       |                  |             |             |             |         |         |            |                        |
| VR-50           | CP4_1876  | O-GlcNAcase NagJ (CPE_1523)                                         | 2      | 19      | 0.90       | 4      | 29      | 0.88       |                  | 6           | 3           | 0.33        | 6       | 48      | 0.89       | 5.86E-04               |
| VR-51           | CP4_1926  | lipoprotein, putative                                               | 3      | 15      | 0.83       | 4      | 20      | 0.83       |                  |             |             |             |         |         |            |                        |
| VR-52           | CP4_1976  | hypothetical protein                                                | 1      | 20      | 0.95       | 11     | 22      | 0.67       | 2.11E-02         | 6           | 3           | 0.33        | 12      | 42      | 0.78       | 6.31E-03               |
| VR-53           | CP4_2009  | conserved hypothetical protein                                      | 4      | 17      | 0.81       | 3      | 28      | 0.90       |                  |             |             |             |         |         |            |                        |
| VR-54           | CP4_2074  | chromosome segregation protein SMC                                  | 3      | 17      | 0.85       | 4      | 25      | 0.86       |                  |             |             |             |         |         |            |                        |
| VR-55           | CP4_2126  | penicillin binding protein transpeptidase domain-containing protein | 3      | 17      | 0.85       | 4      | 28      | 0.88       |                  |             |             |             |         |         |            |                        |
| VR-56           | CP4_2168  | conserved hypothetical protein                                      | 2      | 12      | 0.86       | 3      | 20      | 0.87       |                  |             |             |             |         |         |            |                        |
| VR-57           | CP4_2195  | sensor histidine kinase                                             | 0      | 12      | 1.00       | 0      | 20      | 1.00       |                  | 5           | 2           | 0.29        | 0       | 32      | 1.00       | 2.17E-05               |
|                 | CP4_2196  | conserved hypothetical protein                                      | 2      | 19      | 0.90       | 11     | 22      | 0.67       |                  |             |             |             |         |         |            |                        |
| VR-58           | CP4_2309  | flavohepotoxin                                                      | 0      | 21      | 1.00       | 5      | 23      | 0.82       |                  |             |             |             |         |         |            |                        |
| VR-59           | CP4_2359  | hypothetical protein                                                | 8      | 12      | 0.60       | 19     | 6       | 0.24       | 3.45E-02         | 9           | 0           | 0.00        | 27      | 18      | 0.40       | 9.27E-03               |
| VR-60           | CP4_2372  | Gp10 protein                                                        | 12     | 9       | 0.43       | 21     | 11      | 0.34       |                  | 9           | 0           | 0.00        | 33      | 20      | 0.38       | 1.86E-02               |
|                 | CP4_2376  | phage major capsid protein, HK97 family                             | 13     | 8       | 0.38       | 23     | 9       | 0.28       |                  |             |             |             |         |         |            |                        |
|                 | CP4_2377  | phage prohead protease, HK97 family                                 | 14     | 7       | 0.33       | 27     | 6       | 0.18       |                  |             |             |             |         |         |            |                        |
|                 | CP4_2379  | phage portal protein, HK97 family                                   | 10     | 8       | 0.44       | 16     | 9       | 0.36       |                  |             |             |             |         |         |            |                        |
|                 | CP4_2382  | Gp50 protein                                                        | 13     | 8       | 0.38       | 27     | 6       | 0.18       |                  |             |             |             |         |         |            |                        |
| VR-61           | CP4_2398  | integrase family protein                                            | 12     | 9       | 0.43       | 25     | 7       | 0.22       |                  |             |             |             |         |         |            |                        |
| VR-62           | CP4_2429  | VanZ family membrane protein                                        | 3      | 18      | 0.86       | 9      | 24      | 0.73       |                  | 9           | 0           | 0.00        | 12      | 42      | 0.78       | 8.30E-06               |
|                 | CP4_2431  | conserved hypothetical protein                                      | 9      | 12      | 0.57       | 18     | 15      | 0.45       |                  | 9           | 0           | 0.00        | 27      | 27      | 0.50       | 3.90E-03               |
|                 | CP4_2432  | membrane protein, putative                                          | 6      | 15      | 0.71       | 5      | 28      | 0.85       |                  | 9           | 0           | 0.00        | 11      | 43      | 0.80       | 3.55E-06               |
|                 | CP4_2433  | ABC transporter, ATP-binding protein                                | 7      | 11      | 0.61       | 12     | 15      | 0.56       |                  | 9           | 0           | 0.00        | 19      | 26      | 0.58       | 1.10E-03               |
| VR-63           | CP4_2512  | conserved hypothetical protein                                      | 2      | 19      | 0.90       | 3      | 30      | 0.91       |                  | 5           | 4           | 0.44        | 5       | 49      | 0.91       | 1.89E-03               |
| VR-64           | CP4_2645  | sporulation initiation inhibitor protein Soj                        | 4      | 17      | 0.81       | 18     | 15      | 0.45       | 1.43E-02         |             |             |             |         |         |            |                        |
| VR-65           | CP4_2697  | conserved hypothetical protein                                      | 0      | 21      | 1.00       | 13     | 19      | 0.59       | 1.05E-03         | 7           | 2           | 0.22        | 13      | 40      | 0.75       | 1.89E-03               |
|                 | CP4_2699  | conserved hypothetical protein                                      | 0      | 21      | 1.00       | 13     | 20      | 0.61       | 1.26E-03         |             |             |             |         |         |            |                        |
|                 | CP4_2700  | conserved hypothetical protein                                      | 0      | 20      | 1.00       | 7      | 22      | 0.76       | 3.59E-02         |             |             |             |         |         |            |                        |
| VR-66           | CP4_2736  | type I restriction-modification system, M subunit                   | 9      | 12      | 0.57       | 18     | 15      | 0.45       |                  | 8           | 1           | 0.11        | 26      | 28      | 0.52       | 1.35E-02               |
| VR-67           | CP4_2932  | DNA-binding protein HU                                              | 1      | 17      | 0.94       | 3      | 26      | 0.90       |                  | 3           | 6           | 0.67        | 4       | 44      | 0.92       | 3.06E-02               |
| VR-68           | CP4_3079  | AraC family transcriptional regulator                               | 1      | 20      | 0.95       | 11     | 17      | 0.61       | 8.25E-03         | 7           | 2           | 0.22        | 12      | 37      | 0.76       | 2.17E-03               |
|                 | CP4_3080  | tetracycline resistance protein TetP                                | 1      | 20      | 0.95       | 7      | 26      | 0.79       |                  | 7           | 2           | 0.22        | 8       | 46      | 0.85       | 1.99E-04               |
|                 | CP4_3081  | tetracycline resistance protein                                     | 0      | 21      | 1.00       | 1      | 32      | 0.97       |                  | 6           | 3           | 0.33        | 1       | 53      | 0.98       | 3.55E-06               |
| VR-69           | CP4_3109  | conserved hypothetical protein (pCP13_CPC36)                        | 7      | 14      | 0.67       | 17     | 12      | 0.41       |                  | 8           | 1           | 0.11        | 25      | 25      | 0.50       | 2.61E-02               |
| VR-70           | CP4_3124  | conserved hypothetical protein (pCW3_0007)                          | 1      | 20      | 0.95       | 11     | 22      | 0.67       | 2.11E-02         | 9           | 0           | 0.00        | 12      | 42      | 0.78       | 8.30E-06               |
|                 | CP4_3125  | hypothetical protein                                                | 0      | 21      | 1.00       | 12     | 21      | 0.64       | 2.17E-03         | 6           | 3           | 0.33        | 12      | 42      | 0.78       | 6.31E-03               |
|                 | CP4_3127  | conserved hypothetical protein (pCW3_0008)                          | 0      | 21      | 1.00       | 13     | 20      | 0.61       | 1.26E-03         |             |             |             |         |         |            |                        |
| VR-71           | CP4_3126  | LexA repressor (pCW3_0015)                                          | 0      | 21      | 1.00       | 14     | 18      | 0.56       | 3.71E-04         |             |             |             |         |         |            |                        |

**Table S6. Fisher's exact tests performed on variable genes.** Q-values represent p-values corrected for multiple-testing. Only q-values < 0.05 are shown.

| Variable Region | Locus_tag | Product                                                     | netB + | netB +  | netB +     | netB - | netB -  | netB -     | netB + vs netB - | Non-poultry | Non-poultry | Non-poultry | Poultry | Poultry | Poultry    | Poultry vs Non-poultry |
|-----------------|-----------|-------------------------------------------------------------|--------|---------|------------|--------|---------|------------|------------------|-------------|-------------|-------------|---------|---------|------------|------------------------|
|                 |           |                                                             | Absent | Present | Prevalence | Absent | Present | Prevalence | q-value          | Absent      | Present     | prevalence  | Absent  | Present | prevalence | q-value                |
| VR-72           | CP4_3128  | putative plasmid partitioning protein (pCW3_0013)           | 1      | 19      | 0.95       | 11     | 20      | 0.65       | 1.97E-02         | 6           | 3           | 0.33        | 12      | 39      | 0.76       | 7.16E-03               |
|                 | CP4_3129  | conserved hypothetical protein (pCW3_0012)                  | 3      | 10      | 0.77       | 6      | 11      | 0.65       |                  | 6           | 3           | 0.33        | 9       | 21      | 0.70       | 2.61E-02               |
| VR-73           | CP4_3132  | toxin A                                                     | 1      | 19      | 0.95       | 2      | 28      | 0.93       |                  | 7           | 2           | 0.22        | 3       | 47      | 0.94       | 8.30E-06               |
|                 | CP4_3133  | bacteriocin-related protein                                 | 9      | 12      | 0.57       | 12     | 19      | 0.61       |                  | 7           | 2           | 0.22        | 21      | 31      | 0.60       | 2.95E-02               |
|                 | CP4_3134  | UviA protein                                                | 7      | 5       | 0.42       | 8      | 4       | 0.33       |                  |             |             |             |         |         |            |                        |
|                 | CP4_3136  | transposase for insertion sequence element isrm3            | 9      | 3       | 0.25       | 14     | 1       | 0.07       |                  |             |             |             |         |         |            |                        |
| VR-74           | CP4_3138  | putative ATPase of HSP70 class (pNetB_00004)                | 0      | 21      | 1.00       | 4      | 29      | 0.88       |                  | 5           | 4           | 0.44        | 4       | 50      | 0.93       | 1.00E-03               |
|                 | CP4_3139  | conserved hypothetical protein (pNetB_00003)                | 1      | 20      | 0.95       | 22     | 9       | 0.29       | 8.70E-06         |             |             |             |         |         |            |                        |
| VR-75           | CP4_3153  | thymidine kinase                                            | 4      | 10      | 0.71       | 11     | 14      | 0.56       |                  | 9           | 0           | 0.00        | 15      | 24      | 0.62       | 8.91E-04               |
| VR-76           | CP4_3216  | conserved hypothetical protein                              | 3      | 18      | 0.86       | 1      | 32      | 0.97       |                  | 9           | 0           | 0.00        | 4       | 50      | 0.93       | 3.55E-06               |
| VR-77           | CP4_3229  | conserved hypothetical protein                              | 8      | 13      | 0.62       | 15     | 18      | 0.55       |                  | 9           | 0           | 0.00        | 23      | 31      | 0.57       | 1.17E-03               |
| VR-78           | CP4_3246  | ISCpe2, transposase OrfB                                    | 8      | 1       | 0.11       | 10     | 6       | 0.38       |                  |             |             |             |         |         |            |                        |
| VR-79           | CP4_3270  | conserved hypothetical protein                              | 0      | 21      | 1.00       | 0      | 33      | 1.00       |                  | 9           | 0           | 0.00        | 0       | 54      | 1.00       | 3.55E-06               |
|                 | CP4_3271  | putative transcriptional regulator                          | 14     | 7       | 0.33       | 20     | 13      | 0.39       |                  | 9           | 0           | 0.00        | 34      | 19      | 0.36       | 1.77E-02               |
| VR-80           | CP4_3286  | conserved hypothetical protein                              | 8      | 5       | 0.38       | 13     | 7       | 0.35       |                  | 9           | 0           | 0.00        | 21      | 12      | 0.36       | 1.66E-02               |
|                 | CP4_3340  | plectovirus Spv1-c74 orf 1 and c-terminal truncated protein | 7      | 8       | 0.53       | 9      | 8       | 0.47       |                  | 9           | 0           | 0.00        | 16      | 16      | 0.50       | 3.63E-03               |
| VR-82           | CP4_3348  | collagen adhesion protein                                   | 8      | 4       | 0.33       | 10     | 7       | 0.41       |                  |             |             |             |         |         |            |                        |
| VR-83           | CP4_3359  | conserved hypothetical protein                              | 4      | 17      | 0.81       | 22     | 9       | 0.29       | 9.46E-04         |             |             |             |         |         |            |                        |
|                 | CP4_3360  | collagen adhesin (partial)                                  | 2      | 19      | 0.90       | 9      | 24      | 0.73       |                  | 5           | 4           | 0.44        | 11      | 43      | 0.80       | 1.66E-02               |
| VR-84           | CP4_3361  | collagen adhesin (partial)                                  | 8      | 13      | 0.62       | 23     | 10      | 0.30       | 3.17E-02         |             |             |             |         |         |            |                        |
| VR-85           | CP4_3398  | HNH endonuclease domain protein                             | 5      | 10      | 0.67       | 6      | 9       | 0.60       |                  | 9           | 0           | 0.00        | 11      | 19      | 0.63       | 7.42E-04               |
|                 | CP4_3403  | phage prohead protease, HK97 family                         | 3      | 17      | 0.85       | 5      | 24      | 0.83       |                  | 8           | 1           | 0.11        | 8       | 42      | 0.84       | 4.04E-05               |
|                 | CP4_3404  | phage major capsid protein, HK97 family                     | 8      | 4       | 0.33       | 10     | 4       | 0.29       |                  | 9           | 0           | 0.00        | 18      | 8       | 0.31       | 3.50E-02               |
|                 | CP4_3406  | phage protein, HK97 gp10 family                             | 3      | 18      | 0.86       | 7      | 26      | 0.79       |                  | 9           | 0           | 0.00        | 10      | 44      | 0.81       | 3.55E-06               |
|                 | CP4_3407  | conserved hypothetical protein                              | 7      | 14      | 0.67       | 5      | 25      | 0.83       |                  | 9           | 0           | 0.00        | 12      | 39      | 0.76       | 8.30E-06               |
|                 | CP4_3408  | prophage LambdaSa04, Phi13 family major tail protein        | 6      | 15      | 0.71       | 12     | 20      | 0.63       |                  | 9           | 0           | 0.00        | 18      | 35      | 0.66       | 1.60E-04               |
|                 | CP4_3411  | family phage tail tape measure protein                      | 8      | 12      | 0.60       | 14     | 15      | 0.52       |                  | 9           | 0           | 0.00        | 22      | 27      | 0.55       | 1.30E-03               |
| VR-86           | CP4_3421  | FtsK/Spol                                                   | 3      | 18      | 0.86       | 22     | 10      | 0.31       | 2.56E-04         | 8           | 1           | 0.11        | 25      | 28      | 0.53       | 1.28E-02               |
| VR-87           | CP4_3422  | integrase/recombinase                                       | 1      | 20      | 0.95       | 2      | 28      | 0.93       |                  | 7           | 2           | 0.22        | 3       | 48      | 0.94       | 8.30E-06               |
|                 | CP4_3426  | hypothetical protein                                        | 13     | 7       | 0.35       | 18     | 5       | 0.22       |                  | 9           | 0           | 0.00        | 31      | 12      | 0.28       | 3.96E-02               |
| VR-88           | CP4_3431  | LexA repressor                                              | 0      | 21      | 1.00       | 22     | 7       | 0.24       | 8.70E-06         | 8           | 1           | 0.11        | 22      | 28      | 0.56       | 1.17E-02               |
| VR-89           | CP4_3432  | transporter, major facilitator family                       | 7      | 14      | 0.67       | 27     | 5       | 0.16       | 6.43E-04         |             |             |             |         |         |            |                        |
|                 | CP4_3433  | putative heme biosynthesis protein                          | 9      | 10      | 0.53       | 27     | 3       | 0.10       | 2.80E-03         |             |             |             |         |         |            |                        |
|                 | CP4_3434  | putative radical SAM domain-containing protein              | 3      | 18      | 0.86       | 20     | 13      | 0.39       | 2.04E-03         | 8           | 1           | 0.11        | 23      | 31      | 0.57       | 6.40E-03               |
|                 | CP4_3435  | conserved hypothetical protein                              | 6      | 14      | 0.70       | 23     | 3       | 0.12       | 9.78E-05         |             |             |             |         |         |            |                        |
| VR-90           | CP4_3436  | conserved hypothetical protein                              | 3      | 11      | 0.79       | 15     | 4       | 0.21       | 2.04E-03         |             |             |             |         |         |            |                        |
|                 | CP4_3437  | conserved hypothetical protein                              | 0      | 21      | 1.00       | 19     | 13      | 0.41       | 8.70E-06         |             |             |             |         |         |            |                        |
|                 | CP4_3438  | putative ATPase                                             | 0      | 21      | 1.00       | 13     | 20      | 0.61       | 1.26E-03         | 6           | 3           | 0.33        | 13      | 41      | 0.76       | 8.06E-03               |
| VR-91           | CP4_3439  | transcriptional regulator                                   | 0      | 21      | 1.00       | 7      | 26      | 0.79       | 4.04E-02         | 5           | 4           | 0.44        | 7       | 47      | 0.87       | 5.26E-03               |
|                 | CP4_3441  | beta2 toxin                                                 | 1      | 10      | 0.91       | 6      | 7       | 0.54       |                  | 6           | 3           | 0.33        | 7       | 17      | 0.71       | 4.25E-02               |
| VR-92           | CP4_3442  | transcriptional regulator, MarR family                      | 1      | 12      | 0.92       | 12     | 2       | 0.14       | 9.78E-05         | 9           | 0           | 0.00        | 13      | 14      | 0.52       | 3.00E-03               |
|                 | CP4_3443  | beta-lactamase domain-containing protein                    | 0      | 21      | 1.00       | 24     | 9       | 0.27       | 8.70E-06         | 9           | 0           | 0.00        | 25      | 29      | 0.54       | 1.54E-03               |
|                 | CP4_3444  | M protein trans-acting positive regulator (MGA)             | 1      | 19      | 0.95       | 29     | 2       | 0.06       | 8.70E-06         | 9           | 0           | 0.00        | 31      | 20      | 0.39       | 9.63E-03               |
|                 | CP4_3445  | putative radical SAM domain-containing protein              | 1      | 15      | 0.94       | 19     | 0       | 0.00       | 8.70E-06         | 9           | 0           | 0.00        | 20      | 14      | 0.41       | 8.23E-03               |
|                 | CP4_3446  | putative internalin                                         | 5      | 15      | 0.75       | 25     | 1       | 0.04       | 8.70E-06         | 9           | 0           | 0.00        | 30      | 15      | 0.33       | 1.90E-02               |
|                 | CP4_3447  | hypothetical protein                                        | 2      | 19      | 0.90       | 28     | 3       | 0.10       | 8.70E-06         | 9           | 0           | 0.00        | 31      | 21      | 0.40       | 9.27E-03               |
|                 | CP4_3448  | hypothetical protein                                        | 0      | 18      | 1.00       | 18     | 5       | 0.22       | 8.70E-06         | 9           | 0           | 0.00        | 18      | 23      | 0.56       | 1.25E-03               |
|                 | CP4_3449  | necrotic enteritis toxin B                                  | 0      | 21      | 1.00       | 28     | 5       | 0.15       | 8.70E-06         | 9           | 0           | 0.00        | 29      | 25      | 0.46       | 4.71E-03               |
|                 | CP4_3450  | ricin-type beta-trefoil domain protein                      | 0      | 21      | 1.00       | 11     | 22      | 0.67       | 4.30E-03         | 9           | 0           | 0.00        | 11      | 43      | 0.80       | 3.55E-06               |
|                 | CP4_3451  | transposase for transposon                                  | 0      | 21      | 1.00       | 24     | 9       | 0.27       | 8.70E-06         |             |             |             |         |         |            |                        |
|                 | CP4_3452  | hypothetical protein                                        | 0      | 21      | 1.00       | 19     | 14      | 0.42       | 8.70E-06         |             |             |             |         |         |            |                        |
|                 | CP4_3453  | hypothetical protein                                        | 0      | 21      | 1.00       | 23     | 10      | 0.30       | 8.70E-06         |             |             |             |         |         |            |                        |
|                 | CP4_3454  | chitinase B                                                 | 1      | 20      | 0.95       | 30     | 3       | 0.09       | 8.70E-06         | 9           | 0           | 0.00        | 32      | 22      | 0.41       | 9.15E-03               |

**Table S6. Fisher's exact tests performed on variable genes.** Q-values represent p-values corrected for multiple-testing. Only q-values < 0.05 are shown.

| Variable Region | Locus_tag    | Product                                                   | <i>netB</i> + |         | <i>netB</i> - |        | <i>netB</i> + vs <i>netB</i> -<br>q-value | Non-poultry |            | Poultry |         | Poultry vs Non-poultry |         |    |      |          |
|-----------------|--------------|-----------------------------------------------------------|---------------|---------|---------------|--------|-------------------------------------------|-------------|------------|---------|---------|------------------------|---------|----|------|----------|
|                 |              |                                                           | Absent        | Present | Prevalence    | Absent |                                           | Present     | Prevalence | Absent  | Present | prevalence             | q-value |    |      |          |
|                 | CP4_3455     | chitodextrinase                                           | 0             | 21      | 1.00          | 29     | 4                                         | 0.12        | 8.70E-06   | 9       | 0       | 0.00                   | 30      | 24 | 0.44 | 5.96E-03 |
|                 | CP4_3456     | protein Tlet_1264                                         | 0             | 21      | 1.00          | 7      | 26                                        | 0.79        | 4.04E-02   | 9       | 0       | 0.00                   | 7       | 47 | 0.87 | 3.55E-06 |
|                 | CP4_3457     | CAAX amino terminal protease family                       | 1             | 20      | 0.95          | 28     | 5                                         | 0.15        | 8.70E-06   | 9       | 0       | 0.00                   | 30      | 24 | 0.44 | 5.96E-03 |
|                 | CP4_3458     | putative beta-toxin                                       | 2             | 19      | 0.90          | 32     | 1                                         | 0.03        | 8.70E-06   | 9       | 0       | 0.00                   | 35      | 19 | 0.35 | 1.83E-02 |
|                 | CP4_3459     | putative beta-toxin                                       | 2             | 19      | 0.90          | 31     | 2                                         | 0.06        | 8.70E-06   | 9       | 0       | 0.00                   | 34      | 20 | 0.37 | 1.79E-02 |
|                 | CP4_3460     | conserved hypothetical protein                            | 0             | 21      | 1.00          | 21     | 12                                        | 0.36        | 8.70E-06   | 9       | 0       | 0.00                   | 21      | 33 | 0.61 | 5.23E-04 |
|                 | CP4_3461     | conserved hypothetical protein                            | 0             | 21      | 1.00          | 28     | 2                                         | 0.07        | 8.70E-06   | 9       | 0       | 0.00                   | 29      | 22 | 0.43 | 8.23E-03 |
|                 | CP4_3462     | conserved hypothetical protein                            | 0             | 21      | 1.00          | 12     | 21                                        | 0.64        | 2.17E-03   | 9       | 0       | 0.00                   | 13      | 41 | 0.76 | 1.52E-05 |
|                 | CP4_3464     | resolvase/recombinase                                     | 0             | 21      | 1.00          | 20     | 13                                        | 0.39        | 8.70E-06   | 7       | 2       | 0.22                   | 20      | 34 | 0.63 | 1.48E-02 |
|                 | CP4_3465     | resolvase/recombinase                                     | 2             | 19      | 0.90          | 24     | 9                                         | 0.27        | 8.70E-06   | 8       | 1       | 0.11                   | 26      | 28 | 0.52 | 1.35E-02 |
|                 | CP4_3466     | membrane protein, putative                                | 0             | 21      | 1.00          | 18     | 15                                        | 0.45        | 2.74E-05   | 9       | 0       | 0.00                   | 19      | 35 | 0.65 | 1.99E-04 |
|                 | CP4_3468     | F5/8 type C domain-containing protein                     | 1             | 20      | 0.95          | 13     | 18                                        | 0.58        | 4.30E-03   | 9       | 0       | 0.00                   | 15      | 37 | 0.71 | 4.14E-05 |
|                 | CP4_3469     | diguanylate cyclase/phosphodiesterase domain 2            | 0             | 21      | 1.00          | 24     | 8                                         | 0.25        | 8.70E-06   | 9       | 0       | 0.00                   | 25      | 28 | 0.53 | 1.59E-03 |
|                 | CP4_3470     | sortase family protein                                    | 3             | 18      | 0.86          | 26     | 6                                         | 0.19        | 8.70E-06   |         |         |                        |         |    |      |          |
|                 | CP4_3471     | putative surface protein                                  | 0             | 21      | 1.00          | 16     | 17                                        | 0.52        | 2.56E-04   | 9       | 0       | 0.00                   | 16      | 38 | 0.70 | 5.42E-05 |
|                 | CP4_3472     | peptidoglycan bound protein                               | 3             | 18      | 0.86          | 24     | 9                                         | 0.27        | 8.11E-05   | 8       | 1       | 0.11                   | 27      | 27 | 0.50 | 1.55E-02 |
|                 | CP4_3473     | cell wall surface anchor family protein                   | 0             | 21      | 1.00          | 22     | 11                                        | 0.33        | 8.70E-06   | 9       | 0       | 0.00                   | 22      | 32 | 0.59 | 5.86E-04 |
|                 | CP4_3474     | signal peptidase I                                        | 0             | 21      | 1.00          | 14     | 19                                        | 0.58        | 6.43E-04   |         |         |                        |         |    |      |          |
|                 | CP4_3476     | hypothetical protein                                      | 1             | 20      | 0.95          | 28     | 2                                         | 0.07        | 8.70E-06   | 9       | 0       | 0.00                   | 30      | 21 | 0.41 | 8.70E-03 |
|                 | CP4_3477     | swim zinc finger domain protein                           | 0             | 21      | 1.00          | 14     | 19                                        | 0.58        | 6.43E-04   |         |         |                        |         |    |      |          |
|                 | CP4_3478     | diguanylate cyclase/phosphodiesterase with PAS/PAC sensor | 0             | 21      | 1.00          | 29     | 4                                         | 0.12        | 8.70E-06   | 9       | 0       | 0.00                   | 30      | 24 | 0.44 | 5.96E-03 |
| VR-93           | CP4_3522     | putative phage terminase, large subunit                   | 13            | 1       | 0.07          | 12     | 4                                         | 0.25        |            |         |         |                        |         |    |      |          |
| VR-94           | CP4_3559     | conserved hypothetical protein                            | 6             | 15      | 0.71          | 19     | 14                                        | 0.42        |            |         |         |                        |         |    |      |          |
|                 | CP4_3560     | conserved hypothetical protein                            | 9             | 10      | 0.53          | 22     | 1                                         | 0.04        | 1.26E-03   |         |         |                        |         |    |      |          |
| VR-95           | CP4_3561     | putative ATPase                                           | 0             | 21      | 1.00          | 0      | 33                                        | 1.00        |            | 7       | 2       | 0.22                   | 0       | 54 | 1.00 | 3.55E-06 |
|                 | CP4_3562     | immunoglobulin heavy chain variable region                | 1             | 15      | 0.94          | 13     | 11                                        | 0.46        | 3.00E-03   | 7       | 2       | 0.22                   | 14      | 26 | 0.65 | 1.27E-02 |
|                 | CP4_3563     | conserved hypothetical protein                            | 2             | 19      | 0.90          | 21     | 11                                        | 0.34        | 8.11E-05   |         |         |                        |         |    |      |          |
| VR-96           | CP4_3564     | hypothetical protein                                      | 0             | 21      | 1.00          | 0      | 33                                        | 1.00        |            | 8       | 1       | 0.11                   | 0       | 54 | 1.00 | 3.55E-06 |
|                 | CP4_3565     | hypothetical protein                                      | 5             | 16      | 0.76          | 20     | 8                                         | 0.29        | 1.94E-03   | 8       | 1       | 0.11                   | 25      | 24 | 0.49 | 2.61E-02 |
| VR-97           | CP4_3567     | conserved hypothetical protein                            | 4             | 17      | 0.81          | 18     | 15                                        | 0.45        | 1.43E-02   |         |         |                        |         |    |      |          |
|                 | CP4_3568     | hypothetical protein                                      | 2             | 19      | 0.90          | 24     | 9                                         | 0.27        | 8.70E-06   | 9       | 0       | 0.00                   | 26      | 28 | 0.52 | 1.80E-03 |
|                 | CP4_3569     | resolvase/recombinase                                     | 2             | 14      | 0.88          | 13     | 10                                        | 0.43        | 8.98E-03   |         |         |                        |         |    |      |          |
|                 | CP4_3570     | conserved hypothetical protein                            | 0             | 21      | 1.00          | 11     | 22                                        | 0.67        | 4.30E-03   | 6       | 3       | 0.33                   | 11      | 43 | 0.80 | 4.86E-03 |
|                 | CP4_3572     | NADP-dependent 7-alpha-hydroxysteroid dehydrogenase       | 4             | 17      | 0.81          | 26     | 7                                         | 0.21        | 7.44E-05   | 9       | 0       | 0.00                   | 25      | 28 | 0.53 | 1.59E-03 |
| VR-98           | JGS4143-0023 | phage integrase                                           | 6             | 15      | 0.71          | 9      | 24                                        | 0.73        |            | 7       | 2       | 0.22                   | 14      | 40 | 0.74 | 3.00E-03 |
|                 | JGS4143-0024 | conserved hypothetical protein                            | 9             | 12      | 0.57          | 15     | 18                                        | 0.55        |            | 9       | 0       | 0.00                   | 25      | 29 | 0.54 | 1.54E-03 |
|                 | JGS4143-0025 | phage protein                                             | 12            | 9       | 0.43          | 23     | 10                                        | 0.30        |            |         |         |                        |         |    |      |          |
|                 | JGS4143-0026 | DNA-binding protein, putative                             | 9             | 11      | 0.55          | 15     | 11                                        | 0.42        |            | 9       | 0       | 0.00                   | 24      | 22 | 0.48 | 4.06E-03 |
|                 | JGS4143-0027 | conserved domain protein                                  | 7             | 14      | 0.67          | 16     | 15                                        | 0.48        |            |         |         |                        |         |    |      |          |
|                 | JGS4143-0028 | DNA binding protein, excisionase family,                  | 7             | 14      | 0.67          | 15     | 18                                        | 0.55        |            | 7       | 2       | 0.22                   | 23      | 31 | 0.57 | 3.34E-02 |
|                 | JGS4143-0029 | hypothetical protein                                      | 8             | 13      | 0.62          | 13     | 18                                        | 0.58        |            |         |         |                        |         |    |      |          |
|                 | JGS4143-0030 | replicative DNA helicase                                  | 9             | 12      | 0.57          | 11     | 22                                        | 0.67        |            | 7       | 2       | 0.22                   | 20      | 34 | 0.63 | 1.48E-02 |
|                 | JGS4143-0031 | hypothetical protein                                      | 6             | 15      | 0.71          | 11     | 20                                        | 0.65        |            |         |         |                        |         |    |      |          |
|                 | JGS4143-0032 | kinetochore protein Nuf2 (Cell division                   | 12            | 9       | 0.43          | 22     | 11                                        | 0.33        |            | 9       | 0       | 0.00                   | 34      | 20 | 0.37 | 1.79E-02 |
|                 | JGS4143-0033 | hypothetical protein                                      | 7             | 14      | 0.67          | 8      | 22                                        | 0.73        |            |         |         |                        |         |    |      |          |
|                 | JGS4143-0035 | hypothetical protein                                      | 6             | 15      | 0.71          | 8      | 24                                        | 0.75        |            | 8       | 1       | 0.11                   | 13      | 40 | 0.75 | 3.06E-04 |
|                 | JGS4143-0036 | hypothetical protein                                      | 11            | 10      | 0.48          | 17     | 16                                        | 0.48        |            |         |         |                        |         |    |      |          |
|                 | JGS4143-0037 | hypothetical protein                                      | 11            | 10      | 0.48          | 18     | 15                                        | 0.45        |            |         |         |                        |         |    |      |          |
|                 | JGS4143-0038 | RNA polymerase, sigma 32 subunit, RpoH                    | 11            | 10      | 0.48          | 19     | 11                                        | 0.37        |            |         |         |                        |         |    |      |          |
|                 | JGS4143-0039 | hypothetical protein                                      | 14            | 7       | 0.33          | 19     | 14                                        | 0.42        |            |         |         |                        |         |    |      |          |
|                 | JGS4143-0040 | conserved hypothetical protein                            | 12            | 9       | 0.43          | 25     | 8                                         | 0.24        |            |         |         |                        |         |    |      |          |
|                 | JGS4143-0041 | conserved hypothetical protein                            | 16            | 5       | 0.24          | 31     | 2                                         | 0.06        |            |         |         |                        |         |    |      |          |
|                 | JGS4143-0042 | protein of unknown function                               | 13            | 8       | 0.38          | 23     | 10                                        | 0.30        |            | 9       | 0       | 0.00                   | 36      | 18 | 0.33 | 1.99E-02 |
| VR-99           | JGS4143-0139 | sensor histidine kinase                                   | 0             | 21      | 1.00          | 1      | 32                                        | 0.97        |            | 9       | 0       | 0.00                   | 1       | 53 | 0.98 | 3.55E-06 |
|                 | JGS4143-0141 | hypothetical protein                                      | 0             | 21      | 1.00          | 1      | 32                                        | 0.97        |            | 8       | 1       | 0.11                   | 1       | 53 | 0.98 | 3.55E-06 |
| VR-100          | JGS4143-0157 | conserved hypothetical protein                            | 12            | 9       | 0.43          | 24     | 9                                         | 0.27        |            | 9       | 0       | 0.00                   | 36      | 18 | 0.33 | 1.99E-02 |
|                 | JGS4143-0158 | hypothetical protein                                      | 8             | 13      | 0.62          | 9      | 22                                        | 0.71        |            | 8       | 1       | 0.11                   | 17      | 35 | 0.67 | 1.35E-03 |

**Table S6. Fisher's exact tests performed on variable genes.** Q-values represent p-values corrected for multiple-testing. Only q-values < 0.05 are shown.

| Variable Region | Locus_tag    | Product                                        | netB + |         |            | netB - |         |            | netB + vs netB -<br>q-value | Non-poultry |         | Poultry    |        | Poultry vs Non-poultry |            |          |
|-----------------|--------------|------------------------------------------------|--------|---------|------------|--------|---------|------------|-----------------------------|-------------|---------|------------|--------|------------------------|------------|----------|
|                 |              |                                                | Absent | Present | Prevalence | Absent | Present | Prevalence |                             | Absent      | Present | prevalence | Absent | Present                | prevalence | q-value  |
|                 | JGS4143-0159 | conserved hypothetical protein                 | 4      | 12      | 0.75       | 4      | 20      | 0.83       |                             | 4           | 4       | 0.50       | 7      | 33                     | 0.83       | 2.95E-02 |
|                 | JGS4143-0160 | BRO family, N- domain protein                  | 9      | 12      | 0.57       | 13     | 19      | 0.59       |                             |             |         |            |        |                        |            |          |
|                 | JGS4143-0163 | 2-keto-3-deoxygluconate kinase                 | 11     | 10      | 0.48       | 13     | 20      | 0.61       |                             |             |         |            |        |                        |            |          |
|                 | JGS4143-0164 | beta-glucuronidase (GUS)                       | 1      | 20      | 0.95       | 3      | 30      | 0.91       |                             | 3           | 6       | 0.67       | 4      | 50                     | 0.93       | 2.23E-02 |
|                 | JGS4143-0165 | probable transcriptional regulator             | 4      | 16      | 0.80       | 8      | 23      | 0.74       |                             |             |         |            |        |                        |            |          |
|                 | JGS4143-0167 | khg/kdpg aldolase                              | 8      | 13      | 0.62       | 9      | 19      | 0.68       |                             |             |         |            |        |                        |            |          |
|                 | JGS4143-0168 | mannonate dehydratase                          | 9      | 12      | 0.57       | 13     | 20      | 0.61       |                             |             |         |            |        |                        |            |          |
|                 | JGS4143-0169 | glucuronate isomerase                          | 11     | 10      | 0.48       | 14     | 19      | 0.58       |                             |             |         |            |        |                        |            |          |
|                 | JGS4143-0170 | glucuronide permease                           | 9      | 12      | 0.57       | 12     | 21      | 0.64       |                             |             |         |            |        |                        |            |          |
|                 | JGS4143-0171 | beta-N-acetylglucosaminidase/beta-glucosidase  | 9      | 12      | 0.57       | 14     | 19      | 0.58       |                             |             |         |            |        |                        |            |          |
| VR-101          | JGS4143-0278 | conserved hypothetical protein                 | 10     | 11      | 0.52       | 14     | 15      | 0.52       |                             | 9           | 0       | 0.00       | 23     | 27                     | 0.54       | 1.45E-03 |
|                 | JGS4143-0280 | conserved hypothetical protein                 | 7      | 14      | 0.67       | 12     | 21      | 0.64       |                             | 9           | 0       | 0.00       | 19     | 35                     | 0.65       | 1.99E-04 |
|                 | JGS4143-0281 | conserved hypothetical protein                 | 0      | 21      | 1.00       | 0      | 33      | 1.00       |                             | 9           | 0       | 0.00       | 0      | 54                     | 1.00       | 3.55E-06 |
| VR-102          | JGS4143-0283 | conserved hypothetical protein                 | 17     | 4       | 0.19       | 22     | 11      | 0.33       |                             |             |         |            |        |                        |            |          |
|                 | JGS4143-0284 | conserved domain protein                       | 13     | 8       | 0.38       | 21     | 9       | 0.30       |                             |             |         |            |        |                        |            |          |
| VR-103          | JGS4143-0370 | conserved hypothetical protein                 | 0      | 21      | 1.00       | 14     | 19      | 0.58       | 6.43E-04                    | 5           | 4       | 0.44       | 14     | 40                     | 0.74       | 4.43E-02 |
| VR-104          | JGS4143-0394 | hypothetical protein                           | 0      | 21      | 1.00       | 0      | 33      | 1.00       |                             | 9           | 0       | 0.00       | 0      | 54                     | 1.00       | 3.55E-06 |
|                 | JGS4143-0395 | prophage dna primase                           | 17     | 4       | 0.19       | 30     | 3       | 0.09       |                             |             |         |            |        |                        |            |          |
|                 | JGS4143-0396 | hypothetical protein                           | 17     | 4       | 0.19       | 30     | 3       | 0.09       |                             |             |         |            |        |                        |            |          |
|                 | JGS4143-0397 | hypothetical protein                           | 14     | 7       | 0.33       | 23     | 10      | 0.30       |                             | 9           | 0       | 0.00       | 37     | 17                     | 0.31       | 3.99E-02 |
|                 | JGS4143-0398 | modification methylase EcoRI                   | 16     | 5       | 0.24       | 22     | 11      | 0.33       |                             | 9           | 0       | 0.00       | 38     | 16                     | 0.30       | 3.94E-02 |
|                 | JGS4143-0400 | hypothetical protein                           | 12     | 9       | 0.43       | 25     | 8       | 0.24       |                             | 9           | 0       | 0.00       | 38     | 16                     | 0.30       | 3.94E-02 |
|                 | JGS4143-0401 | hypothetical protein                           | 17     | 4       | 0.19       | 30     | 3       | 0.09       |                             |             |         |            |        |                        |            |          |
|                 | JGS4143-0403 | hypothetical protein                           | 14     | 7       | 0.33       | 27     | 6       | 0.18       |                             |             |         |            |        |                        |            |          |
| VR-105          | JGS4143-0472 | conserved hypothetical protein                 | 1      | 13      | 0.93       | 3      | 20      | 0.77       |                             | 8           | 1       | 0.11       | 4      | 33                     | 0.89       | 8.30E-06 |
|                 | JGS4143-0473 | conserved hypothetical protein                 | 2      | 19      | 0.90       | 13     | 18      | 0.58       | 1.63E-02                    | 9           | 0       | 0.00       | 15     | 37                     | 0.71       | 4.14E-05 |
|                 | JGS4143-0474 | hypothetical protein                           | 0      | 20      | 1.00       | 5      | 27      | 0.84       |                             | 9           | 0       | 0.00       | 5      | 47                     | 0.90       | 3.55E-06 |
|                 | JGS4143-0475 | hypothetical protein                           | 4      | 17      | 0.81       | 20     | 13      | 0.39       | 5.40E-03                    | 9           | 0       | 0.00       | 24     | 30                     | 0.56       | 1.29E-03 |
|                 | JGS4143-0476 | helix-turn-helix domain protein                | 12     | 8       | 0.40       | 23     | 7       | 0.23       |                             |             |         |            |        |                        |            |          |
|                 | JGS4143-0477 | conserved hypothetical protein                 | 11     | 8       | 0.42       | 20     | 6       | 0.23       |                             |             |         |            |        |                        |            |          |
|                 | JGS4143-0478 | hypothetical protein                           | 0      | 20      | 1.00       | 12     | 19      | 0.61       | 2.04E-03                    | 9           | 0       | 0.00       | 12     | 39                     | 0.76       | 8.30E-06 |
|                 | JGS4143-0480 | conserved domain protein                       | 7      | 14      | 0.67       | 13     | 20      | 0.61       |                             | 8           | 1       | 0.11       | 19     | 35                     | 0.65       | 2.09E-03 |
| VR-106          | JGS4143-0483 | conserved hypothetical protein                 | 7      | 14      | 0.67       | 10     | 23      | 0.70       |                             |             |         |            |        |                        |            |          |
| VR-107          | JGS4143-0498 | transposon, resolvase                          | 2      | 15      | 0.88       | 6      | 20      | 0.77       |                             | 7           | 2       | 0.22       | 8      | 36                     | 0.82       | 7.21E-04 |
|                 | JGS4143-0499 | transposase                                    | 0      | 13      | 1.00       | 2      | 20      | 0.91       |                             | 6           | 3       | 0.33       | 2      | 34                     | 0.94       | 1.71E-04 |
|                 | JGS4143-0500 | hypothetical protein                           | 11     | 10      | 0.48       | 20     | 13      | 0.39       |                             |             |         |            |        |                        |            |          |
|                 | JGS4143-0501 | transposase, OrfB family                       | 4      | 16      | 0.80       | 4      | 24      | 0.86       |                             | 6           | 3       | 0.33       | 8      | 40                     | 0.83       | 2.28E-03 |
| VR-108          | JGS4143-0507 | 4Fe-4S ferredoxin iron-sulfur binding domain   | 18     | 3       | 0.14       | 20     | 13      | 0.39       |                             |             |         |            |        |                        |            |          |
| VR-109          | JGS4143-0520 | conserved hypothetical protein                 | 4      | 17      | 0.81       | 2      | 29      | 0.94       |                             | 4           | 5       | 0.56       | 5      | 47                     | 0.90       | 9.15E-03 |
|                 | JGS4143-0524 | capsular polysaccharide biosynthesis protein   | 6      | 13      | 0.68       | 9      | 20      | 0.69       |                             | 9           | 0       | 0.00       | 14     | 34                     | 0.71       | 7.83E-05 |
|                 | JGS4143-0525 | sugar transferases involved in                 | 13     | 8       | 0.38       | 19     | 14      | 0.42       |                             | 9           | 0       | 0.00       | 32     | 22                     | 0.41       | 9.15E-03 |
|                 | JGS4143-0526 | dtdp-4-dehydrorhamnose 3,5-epimerase, putative | 7      | 14      | 0.67       | 9      | 24      | 0.73       |                             | 9           | 0       | 0.00       | 15     | 39                     | 0.72       | 4.04E-05 |
|                 | JGS4143-0527 | capsular polysaccharide biosynthesis protein   | 11     | 10      | 0.48       | 16     | 15      | 0.48       |                             | 9           | 0       | 0.00       | 27     | 25                     | 0.48       | 3.91E-03 |
|                 | JGS4143-0528 | polysaccharide biosynthesis protein CapD       | 17     | 4       | 0.19       | 27     | 6       | 0.18       |                             |             |         |            |        |                        |            |          |
|                 | JGS4143-0529 | NAD-dependent epimerase/dehydratase            | 17     | 4       | 0.19       | 17     | 16      | 0.48       | 4.58E-02                    | 9           | 0       | 0.00       | 34     | 20                     | 0.37       | 1.79E-02 |
|                 | JGS4143-0530 | UDP-N-acetylglucosamine 2-epimerase            | 18     | 3       | 0.14       | 24     | 9       | 0.27       |                             |             |         |            |        |                        |            |          |
|                 | JGS4143-0531 | putative glycosyl transferase                  | 16     | 5       | 0.24       | 27     | 6       | 0.18       |                             |             |         |            |        |                        |            |          |
|                 | JGS4143-0532 | putative transferase                           | 17     | 4       | 0.19       | 27     | 6       | 0.18       |                             |             |         |            |        |                        |            |          |
|                 | JGS4143-0534 | glycosyl transferase, group 2 family protein   | 5      | 16      | 0.76       | 11     | 22      | 0.67       |                             | 9           | 0       | 0.00       | 16     | 38                     | 0.70       | 5.42E-05 |
|                 | JGS4143-0535 | flippase Wzx                                   | 15     | 6       | 0.29       | 27     | 6       | 0.18       |                             |             |         |            |        |                        |            |          |
| VR-110          | JGS4143-0536 | udp-glucose 6-dehydrogenase (udp-glc)          | 8      | 13      | 0.62       | 21     | 12      | 0.36       |                             | 9           | 0       | 0.00       | 29     | 25                     | 0.46       | 4.71E-03 |
|                 | JGS4143-0537 | transcriptional regulator, LytR family         | 7      | 14      | 0.67       | 8      | 25      | 0.76       |                             | 8           | 1       | 0.11       | 16     | 38                     | 0.70       | 7.80E-04 |
| VR-111          | JGS4143-0546 | transcriptional regulator, AraC family         | 10     | 11      | 0.52       | 17     | 15      | 0.47       |                             |             |         |            |        |                        |            |          |
| VR-113          | JGS4143-0593 | conserved hypothetical protein                 | 8      | 13      | 0.62       | 8      | 23      | 0.74       |                             |             |         |            |        |                        |            |          |
| VR-114          | JGS4143-0613 | cell wall binding repeat domain protein        | 7      | 14      | 0.67       | 14     | 19      | 0.58       |                             |             |         |            |        |                        |            |          |
| VR-115          | JGS4143-0727 | conserved hypothetical protein                 | 9      | 12      | 0.57       | 13     | 20      | 0.61       |                             |             |         |            |        |                        |            |          |
|                 | JGS4143-0728 | voltage-gated chloride channel family protein  | 9      | 12      | 0.57       | 15     | 18      | 0.55       |                             |             |         |            |        |                        |            |          |
|                 | JGS4143-0729 | voltage-gated chloride channel family protein  | 4      | 17      | 0.81       | 8      | 25      | 0.76       |                             | 6           | 3       | 0.33       | 13     | 41                     | 0.76       | 8.06E-03 |



**Table S6. Fisher's exact tests performed on variable genes.** Q-values represent p-values corrected for multiple-testing. Only q-values < 0.05 are shown.

| Variable Region | Locus_tag    | Product                                        | netB+  | netB+   | netB+      | netB-  | netB-   | netB-      | netB+ vs netB- | Non-poultry |         | Poultry    |        | Poultry vs Non-poultry |            |          |
|-----------------|--------------|------------------------------------------------|--------|---------|------------|--------|---------|------------|----------------|-------------|---------|------------|--------|------------------------|------------|----------|
|                 |              |                                                | Absent | Present | Prevalence | Absent | Present | Prevalence | q-value        | Absent      | Present | prevalence | Absent | Present                | prevalence | q-value  |
| VR-116          | JGS4143-0804 | conserved hypothetical protein                 | 6      | 15      | 0.71       | 12     | 21      | 0.64       |                |             |         |            |        |                        |            |          |
| VR-117          | JGS4143-0810 | hypothetical protein                           | 6      | 15      | 0.71       | 10     | 23      | 0.70       |                | 9           | 0       | 0.00       | 17     | 37                     | 0.69       | 8.58E-05 |
| VR-118          | JGS4143-0827 | conserved hypothetical protein                 | 1      | 20      | 0.95       | 1      | 32      | 0.97       |                | 5           | 4       | 0.44       | 2      | 52                     | 0.96       | 2.47E-04 |
| VR-119          | JGS4143-0843 | hypothetical protein                           | 12     | 9       | 0.43       | 7      | 26      | 0.79       | 1.43E-02       |             |         |            |        |                        |            |          |
| VR-120          | JGS4143-0907 | YhbE                                           | 3      | 15      | 0.83       | 4      | 19      | 0.83       |                | 8           | 1       | 0.11       | 7      | 35                     | 0.83       | 4.14E-05 |
|                 | JGS4143-0908 | YhbF                                           | 6      | 13      | 0.68       | 7      | 21      | 0.75       |                | 6           | 2       | 0.25       | 12     | 35                     | 0.74       | 5.96E-03 |
|                 | JGS4143-0909 | YhbD                                           | 3      | 16      | 0.84       | 4      | 21      | 0.84       |                | 6           | 3       | 0.33       | 7      | 37                     | 0.84       | 2.19E-03 |
| VR-121          | JGS4143-0922 | phage protein                                  | 9      | 12      | 0.57       | 13     | 20      | 0.61       |                |             |         |            |        |                        |            |          |
|                 | JGS4143-0925 | hypothetical protein                           | 0      | 12      | 1.00       | 0      | 18      | 1.00       |                | 7           | 0       | 0.00       | 0      | 30                     | 1.00       | 3.55E-06 |
|                 | JGS4143-0926 | VanZ like family                               | 0      | 21      | 1.00       | 2      | 29      | 0.94       |                | 9           | 0       | 0.00       | 2      | 50                     | 0.96       | 3.55E-06 |
|                 | JGS4143-0927 | hypothetical protein                           | 7      | 13      | 0.65       | 8      | 21      | 0.72       |                | 9           | 0       | 0.00       | 14     | 35                     | 0.71       | 4.14E-05 |
|                 | JGS4143-0928 | hypothetical protein                           | 1      | 20      | 0.95       | 8      | 24      | 0.75       |                | 9           | 0       | 0.00       | 9      | 44                     | 0.83       | 3.55E-06 |
|                 | JGS4143-0929 | hypothetical protein                           | 8      | 13      | 0.62       | 9      | 17      | 0.65       |                | 9           | 0       | 0.00       | 16     | 31                     | 0.66       | 1.71E-04 |
|                 | JGS4143-0930 | FunZ family protein                            | 0      | 10      | 1.00       | 0      | 18      | 1.00       |                | 7           | 0       | 0.00       | 0      | 29                     | 1.00       | 3.55E-06 |
|                 | JGS4143-0931 | FunZ family protein                            | 1      | 12      | 0.92       | 3      | 19      | 0.86       |                | 8           | 0       | 0.00       | 4      | 32                     | 0.89       | 3.55E-06 |
| VR-122          | JGS4143-0934 | two-component sensor kinase YesM, putative     | 13     | 8       | 0.38       | 22     | 9       | 0.29       |                |             |         |            |        |                        |            |          |
|                 | JGS4143-0936 | ABC-type sugar transport system, periplasmic   | 3      | 13      | 0.81       | 5      | 19      | 0.79       |                | 5           | 3       | 0.38       | 8      | 33                     | 0.80       | 9.63E-03 |
|                 | JGS4143-0937 | ABC transporter, permease protein              | 14     | 7       | 0.33       | 20     | 13      | 0.39       |                |             |         |            |        |                        |            |          |
|                 | JGS4143-0938 | ABC transporter, permease protein              | 10     | 11      | 0.52       | 19     | 14      | 0.42       |                |             |         |            |        |                        |            |          |
|                 | JGS4143-0939 | glycosyl hydrolase, family 31                  | 0      | 14      | 1.00       | 4      | 19      | 0.83       |                | 4           | 3       | 0.43       | 4      | 34                     | 0.89       | 6.76E-03 |
|                 | JGS4143-0940 | alpha-N-acetylglucosaminidase family protein   | 6      | 13      | 0.68       | 14     | 14      | 0.50       |                |             |         |            |        |                        |            |          |
| VR-123          | JGS4143-0949 | glycosyl hydrolase, family 20, putative        | 16     | 5       | 0.24       | 26     | 7       | 0.21       |                |             |         |            |        |                        |            |          |
|                 | JGS4143-0950 | glycosyl hydrolase, family 20                  | 9      | 11      | 0.55       | 15     | 15      | 0.50       |                |             |         |            |        |                        |            |          |
| VR-124          | JGS4143-0969 | two-component sensor histidine kinase          | 2      | 19      | 0.90       | 3      | 30      | 0.91       |                |             |         |            |        |                        |            |          |
| VR-125          | JGS4143-1023 | phosphorylase family protein                   | 0      | 21      | 1.00       | 3      | 30      | 0.91       |                | 5           | 4       | 0.44       | 3      | 51                     | 0.94       | 5.23E-04 |
| VR-126          | JGS4143-1062 | RNA polymerase sigma-70 factor                 | 7      | 12      | 0.63       | 2      | 27      | 0.93       | 2.82E-02       | 4           | 3       | 0.43       | 8      | 40                     | 0.83       | 1.48E-02 |
|                 | JGS4143-1063 | hypothetical protein                           | 0      | 12      | 1.00       | 0      | 18      | 1.00       |                | 4           | 3       | 0.43       | 0      | 31                     | 1.00       | 3.24E-04 |
| VR-127          | JGS4143-1246 | HNH endonuclease domain protein                | 2      | 13      | 0.87       | 5      | 17      | 0.77       |                | 9           | 0       | 0.00       | 7      | 30                     | 0.81       | 8.30E-06 |
|                 | JGS4143-1247 | phage Terminase Small Subunit                  | 2      | 14      | 0.88       | 3      | 20      | 0.87       |                | 9           | 0       | 0.00       | 5      | 35                     | 0.88       | 3.55E-06 |
|                 | JGS4143-1248 | putative phage terminase, large subunit        | 2      | 19      | 0.90       | 2      | 30      | 0.94       |                | 8           | 1       | 0.11       | 4      | 49                     | 0.92       | 3.55E-06 |
|                 | JGS4143-1249 | hypothetical protein                           | 5      | 15      | 0.75       | 9      | 20      | 0.69       |                | 9           | 0       | 0.00       | 14     | 35                     | 0.71       | 4.14E-05 |
|                 | JGS4143-1250 | conserved hypothetical protein                 | 1      | 20      | 0.95       | 9      | 22      | 0.71       | 4.11E-02       | 9           | 0       | 0.00       | 9      | 43                     | 0.83       | 3.55E-06 |
|                 | JGS4143-1251 | portal protein                                 | 9      | 11      | 0.55       | 11     | 16      | 0.59       |                | 9           | 0       | 0.00       | 19     | 28                     | 0.60       | 1.10E-03 |
|                 | JGS4143-1252 | phage prohead protease, HK97 family            | 3      | 18      | 0.86       | 10     | 22      | 0.69       |                | 7           | 2       | 0.22       | 13     | 40                     | 0.75       | 1.89E-03 |
|                 | JGS4143-1253 | phage major capsid protein, HK97 family        | 6      | 14      | 0.70       | 13     | 14      | 0.52       |                | 9           | 0       | 0.00       | 19     | 28                     | 0.60       | 1.10E-03 |
|                 | JGS4143-1254 | conserved hypothetical protein                 | 5      | 16      | 0.76       | 8      | 23      | 0.74       |                | 9           | 0       | 0.00       | 12     | 40                     | 0.77       | 8.30E-06 |
|                 | JGS4143-1255 | phage head-tail adaptor, putative              | 6      | 12      | 0.67       | 12     | 10      | 0.45       |                | 9           | 0       | 0.00       | 18     | 22                     | 0.55       | 1.35E-03 |
|                 | JGS4143-1256 | phage protein, HK97 gp10 family                | 0      | 21      | 1.00       | 5      | 28      | 0.85       |                | 7           | 2       | 0.22       | 5      | 49                     | 0.91       | 4.04E-05 |
|                 | JGS4143-1257 | conserved hypothetical protein                 | 0      | 17      | 1.00       | 5      | 22      | 0.81       |                | 9           | 0       | 0.00       | 5      | 40                     | 0.89       | 3.55E-06 |
|                 | JGS4143-1258 | phage major tail protein, Phi13 family         | 15     | 5       | 0.25       | 25     | 2       | 0.07       |                |             |         |            |        |                        |            |          |
|                 | JGS4143-1259 | conserved hypothetical protein                 | 0      | 21      | 1.00       | 4      | 27      | 0.87       |                | 9           | 0       | 0.00       | 4      | 48                     | 0.92       | 3.55E-06 |
|                 | JGS4143-1260 | phage tail tape measure protein, family, core  | 1      | 15      | 0.94       | 5      | 21      | 0.81       |                | 9           | 0       | 0.00       | 6      | 36                     | 0.86       | 3.55E-06 |
| VR-128          | JGS4143-1337 | nucleotidyltransferase family protein          | 0      | 14      | 1.00       | 4      | 19      | 0.83       |                | 9           | 0       | 0.00       | 4      | 33                     | 0.89       | 3.55E-06 |
| VR-129          | JGS4143-1380 | hypothetical protein                           | 1      | 20      | 0.95       | 5      | 27      | 0.84       |                | 9           | 0       | 0.00       | 5      | 48                     | 0.91       | 3.55E-06 |
| VR-130          | JGS4143-1385 | endo-alpha-N-acetylglucosaminidase             | 4      | 17      | 0.81       | 0      | 30      | 1.00       | 2.82E-02       | 4           | 5       | 0.56       | 3      | 48                     | 0.94       | 3.66E-03 |
| VR-131          | JGS4143-1408 | hypothetical protein                           | 0      | 21      | 1.00       | 18     | 15      | 0.45       | 2.74E-05       | 9           | 0       | 0.00       | 18     | 36                     | 0.67       | 1.34E-04 |
| VR-132          | JGS4143-1441 | putative alpha-N-acetylglucosaminidase         | 10     | 11      | 0.52       | 13     | 20      | 0.61       |                |             |         |            |        |                        |            |          |
| VR-133          | JGS4143-1447 | hypothetical protein                           | 16     | 5       | 0.24       | 26     | 5       | 0.16       |                |             |         |            |        |                        |            |          |
|                 | JGS4143-1448 | type III restriction enzyme, res subunit       | 3      | 18      | 0.86       | 16     | 17      | 0.52       | 2.11E-02       | 8           | 1       | 0.11       | 19     | 35                     | 0.65       | 2.09E-03 |
|                 | JGS4143-1449 | conserved hypothetical protein                 | 15     | 6       | 0.29       | 24     | 8       | 0.25       |                |             |         |            |        |                        |            |          |
|                 | JGS4143-1450 | RNA polymerase sigma factor, sigma-70 family   | 8      | 9       | 0.53       | 14     | 10      | 0.42       |                |             |         |            |        |                        |            |          |
|                 | JGS4143-1451 | nucleoside triphosphatase, D5 family, putative | 12     | 9       | 0.43       | 24     | 9       | 0.27       |                |             |         |            |        |                        |            |          |
|                 | JGS4143-1452 | DNA-directed DNA polymerase                    | 12     | 9       | 0.43       | 27     | 6       | 0.18       |                |             |         |            |        |                        |            |          |
|                 | JGS4143-1453 | DNA-binding protein                            | 16     | 5       | 0.24       | 29     | 3       | 0.09       |                |             |         |            |        |                        |            |          |
|                 | JGS4143-1454 | conserved hypothetical protein                 | 13     | 4       | 0.24       | 21     | 3       | 0.13       |                |             |         |            |        |                        |            |          |
|                 | JGS4143-1455 | conserved hypothetical protein                 | 2      | 14      | 0.88       | 3      | 23      | 0.88       |                | 8           | 1       | 0.11       | 5      | 38                     | 0.88       | 8.30E-06 |
| VR-134          | JGS4143-1456 | F5/8 type C domain containing protein          | 11     | 10      | 0.48       | 10     | 20      | 0.67       |                |             |         |            |        |                        |            |          |
| VR-135          | JGS4143-1460 | FLIB family protein                            | 10     | 9       | 0.47       | 17     | 10      | 0.37       |                |             |         |            |        |                        |            |          |
| VR-136          | JGS4143-1482 | NADH oxidase                                   | 3      | 18      | 0.86       | 2      | 30      | 0.94       |                | 4           | 5       | 0.56       | 5      | 48                     | 0.91       | 8.13E-03 |
|                 | JGS4143-1483 | hydrolases of the alpha/beta superfamily       | 17     | 4       | 0.19       | 17     | 16      | 0.48       | 4.58E-02       |             |         |            |        |                        |            |          |

**Table S6. Fisher's exact tests performed on variable genes.** Q-values represent p-values corrected for multiple-testing. Only q-values < 0.05 are shown.

| Variable Region | Locus_tag      | Product                               | <i>netB</i> + |         | <i>netB</i> - |        | <i>netB</i> - vs <i>netB</i> - | Non-poultry | Non-poultry | Non-poultry | Poultry | Poultry | Poultry | Poultry vs Non-poultry |          |            |
|-----------------|----------------|---------------------------------------|---------------|---------|---------------|--------|--------------------------------|-------------|-------------|-------------|---------|---------|---------|------------------------|----------|------------|
|                 |                |                                       | Absent        | Present | Prevalence    | Absent |                                |             |             |             |         |         |         |                        | Present  | Prevalence |
| VR-137          | JGS4143-1484   | C4-dicarboxylate transport system     | 12            | 6       | 0.33          | 9      | 18                             | 0.67        | 4.58E-02    | 5           | 4       | 0.44    | 4       | 34                     | 0.89     | 3.68E-03   |
|                 | JGS4143-1486   | C4-dicarboxylate transport system     | 3             | 13      | 0.81          | 1      | 20                             | 0.95        |             |             |         |         |         |                        |          |            |
| VR-138          | JGS4143-1847   | hypothetical protein                  | 6             | 14      | 0.70          | 8      | 20                             | 0.71        | 7           | 2           | 0.22    | 14      | 34      | 0.71                   | 5.00E-03 |            |
| VR-139          | JGS4143-2057   | hypothetical protein                  | 4             | 15      | 0.79          | 4      | 24                             | 0.86        |             |             |         |         |         |                        |          |            |
| VR-140          | JGS4143-2323   | ABC transporter, ATP-binding protein  | 3             | 18      | 0.86          | 4      | 29                             | 0.88        |             |             |         |         |         |                        |          |            |
| VR-141          | JGS4143-2973   | transporter, monovalent cation:proton | 8             | 13      | 0.62          | 12     | 21                             | 0.64        |             |             |         |         |         |                        |          |            |
| VR-142          | pBCNF5603_uviA | UviA protein                          | 0             | 11      | 1.00          | 1      | 18                             | 0.95        | 5           | 4           | 0.44    | 1       | 29      | 0.97                   | 7.42E-04 |            |
|                 | pBCNF5603_uviB | UviB protein                          | 0             | 19      | 1.00          | 4      | 27                             | 0.87        | 3           | 5           | 0.63    | 4       | 46      | 0.92                   | 1.86E-02 |            |
|                 | pCPF4969_51    | putative SpaC protein                 | 1             | 15      | 0.94          | 1      | 18                             | 0.95        | 8           | 1           | 0.11    | 2       | 33      | 0.94                   | 3.55E-06 |            |
|                 | pCPF5603_10    | collagen adhesion protein             | 1             | 20      | 0.95          | 9      | 24                             | 0.73        | 4           | 5           | 0.56    | 10      | 44      | 0.81                   | 4.07E-02 |            |
|                 | pCPF5603_68    | putative Tn916 ORF15 protein          | 3             | 18      | 0.86          | 16     | 16                             | 0.50        | 1.13E-02    |             |         |         |         |                        |          |            |
|                 | pCPF5603_70    | putative Tn916 ORF16 protein          | 0             | 21      | 1.00          | 10     | 23                             | 0.70        | 5.25E-03    | 4           | 5       | 0.56    | 10      | 44                     | 0.81     | 4.07E-02   |

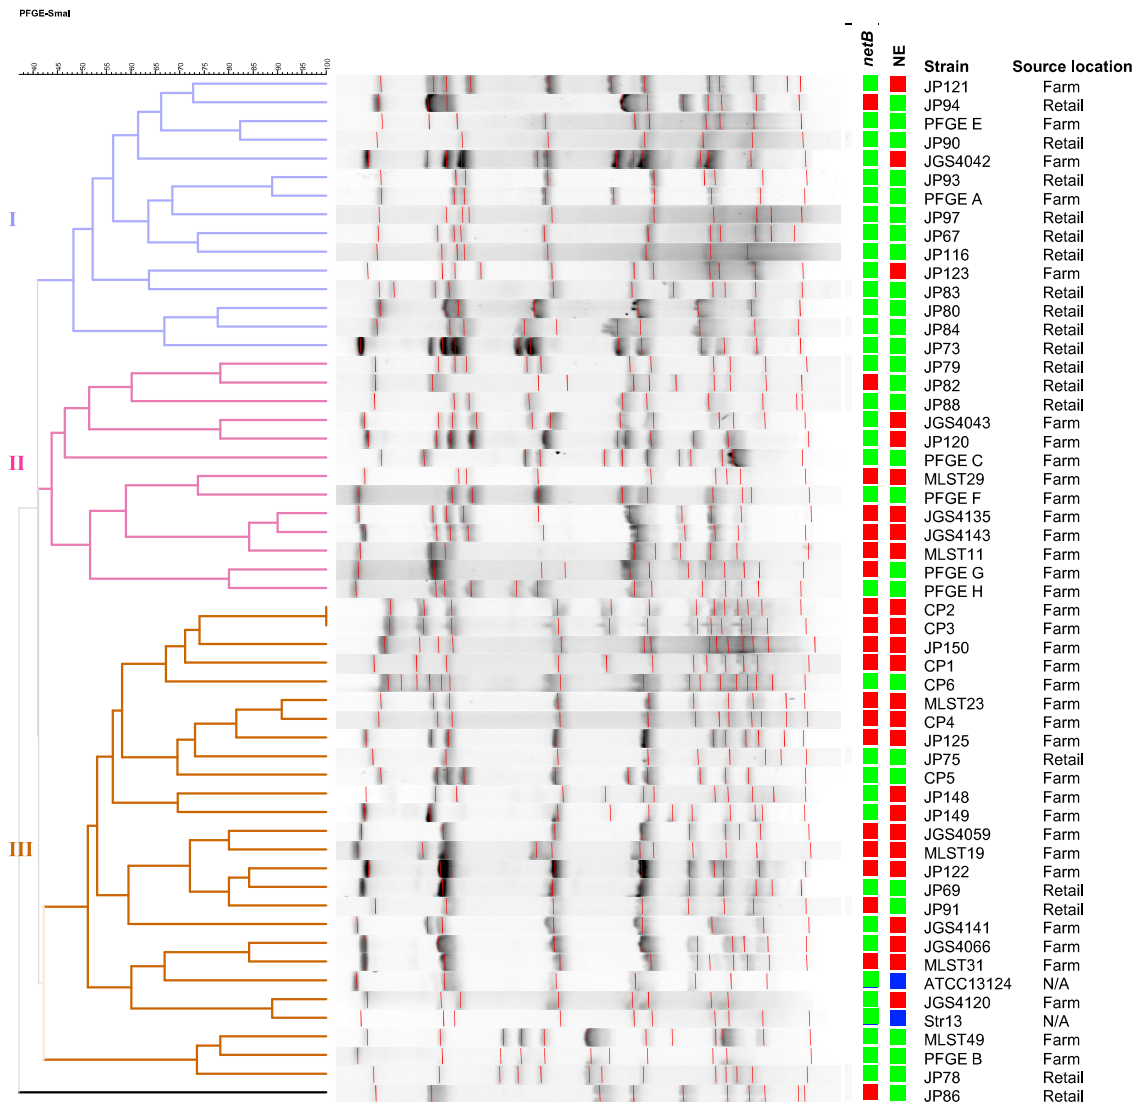

**Figure S1. PFGE of *C. perfringens* poultry isolates from diseased and healthy birds.** PFGE patterns obtained from *SmaI*-digested DNA from *C. perfringens* poultry isolates. The dendrogram was obtained by unweighted pair group method using arithmetic averages clustering with a Dice coefficient and 1% position tolerance. The presence of *netB* (red, present; green, absent) is indicated in the first column and disease association (red, NE; green, healthy; blue, non-poultry) in the second. The three major clusters are indicated by roman numerals.

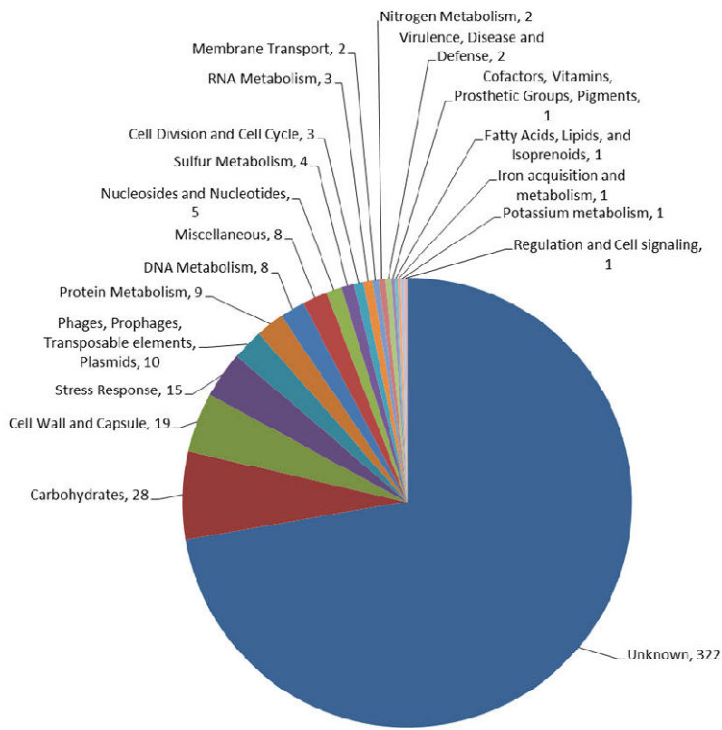

**Figure S2. Functional categories of genes exhibiting variability among *C. perfringens* strains.** Functional categories were identified by the RAST server (<http://rast.nmpdr.org/>).

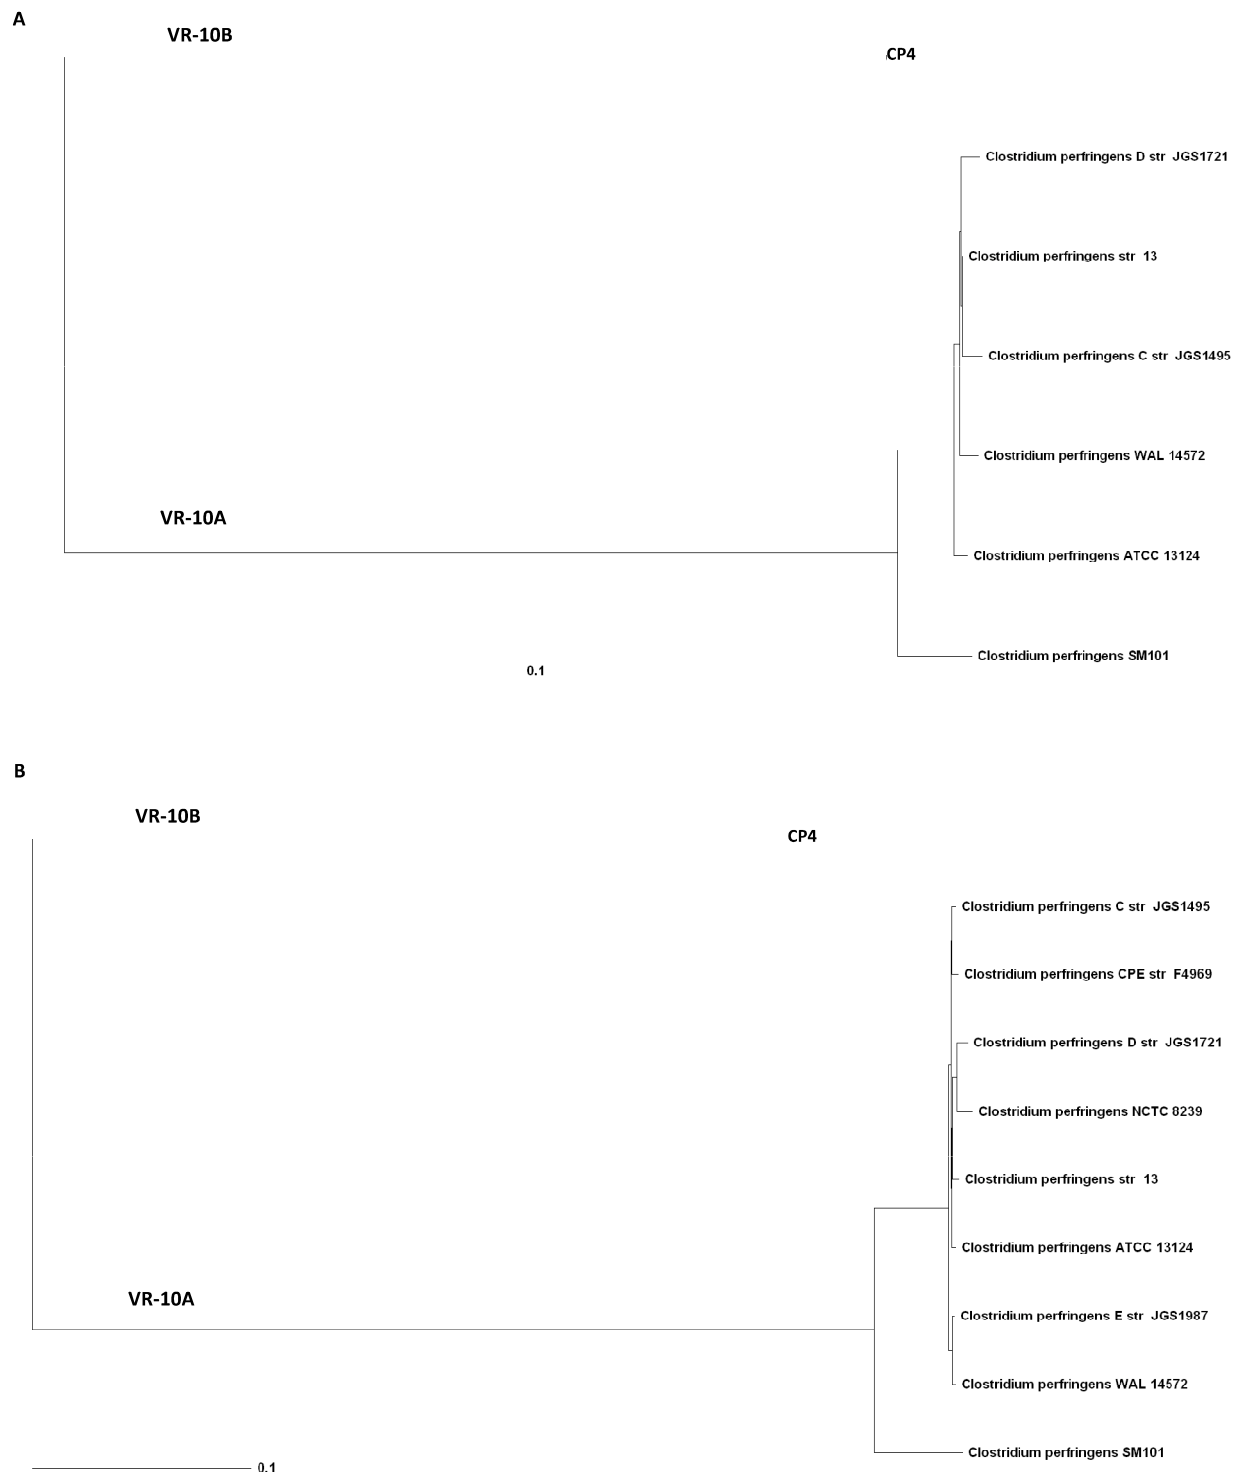

**Figure S3. Sequence alignment of VR-10 two-component system genes from two different alleles. A) response regulator, B) sensor histidine kinase. The distance trees represent Blast alignments of protein sequences from the two-component systems found in VR-10A and VR-10B .**
